# Supplementary material for: A protic ionic liquid catalyzed strategy for selective hydrolytic cleavage of tert-butyloxycarbonyl amine (N-Boc)
Source: Royal Society of Chemistry journal article supplement (doi:10.1039/c4ra13419b), 2014-12-04

## A protic ionic liquid catalyzed strategy for selective hydrolytic cleavage of *tert*-butyloxycarbonyl amine (N-Boc)

Swapan Majumdar,<sup>a\*</sup> Jhinuk De,<sup>a</sup> Ankita Chakraborty,<sup>a</sup> Dipanwita Roy<sup>b</sup> and Dilip K. Maiti<sup>b</sup>

<sup>a</sup>Department of Chemistry, Tripura University, Suryamaninagar, 799 022, INDIA,  
E-mail: [smajumdar@tripurauniv.in](mailto:smajumdar@tripurauniv.in); Tel: +91-381-237-9070; Fax: +91-381-2374802;

<sup>b</sup>Department of Chemistry, University of Calcutta, 92, A. P. C. Road, Kolkata 700 009, INDIA

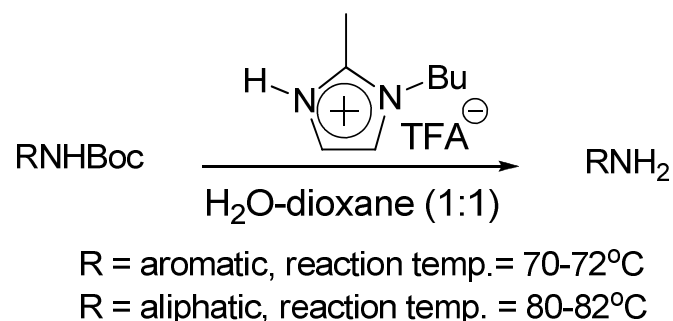

**General procedure:** To a stirred solution of N-Boc amine (1 mmol) in water-dioxane (1:1, 2 ml), protic ionic liquid I (1 equiv. or 10 mol%) was added and then the mixture was heated at 70-72°C or 80-82°C (depending upon the nature of substrate as indicated in Table 2-5) until the complete consumption of starting material (reaction monitored by TLC). After completion of the reaction, dioxane was removed under reduced pressure and the mixture was diluted with water (5 ml). Then the mixture was extracted with diethyl ether or ethyl acetate (3x5 ml), washed with water, dried over anhydrous Na<sub>2</sub>SO<sub>4</sub> and concentrated under reduced pressure. The crude product was then passed through a short pad silica-gel to afford parent amines. The product was characterized by IR, <sup>1</sup>H and <sup>13</sup>C NMR spectral data and compare with authentic samples. The aqueous part containing ionic liquid was recycled. Selected <sup>1</sup>H and <sup>13</sup>C NMR spectra were given below.

$^1\text{H}$  NMR of **1e** ( $\text{CDCl}_3$ , 300 MHz)

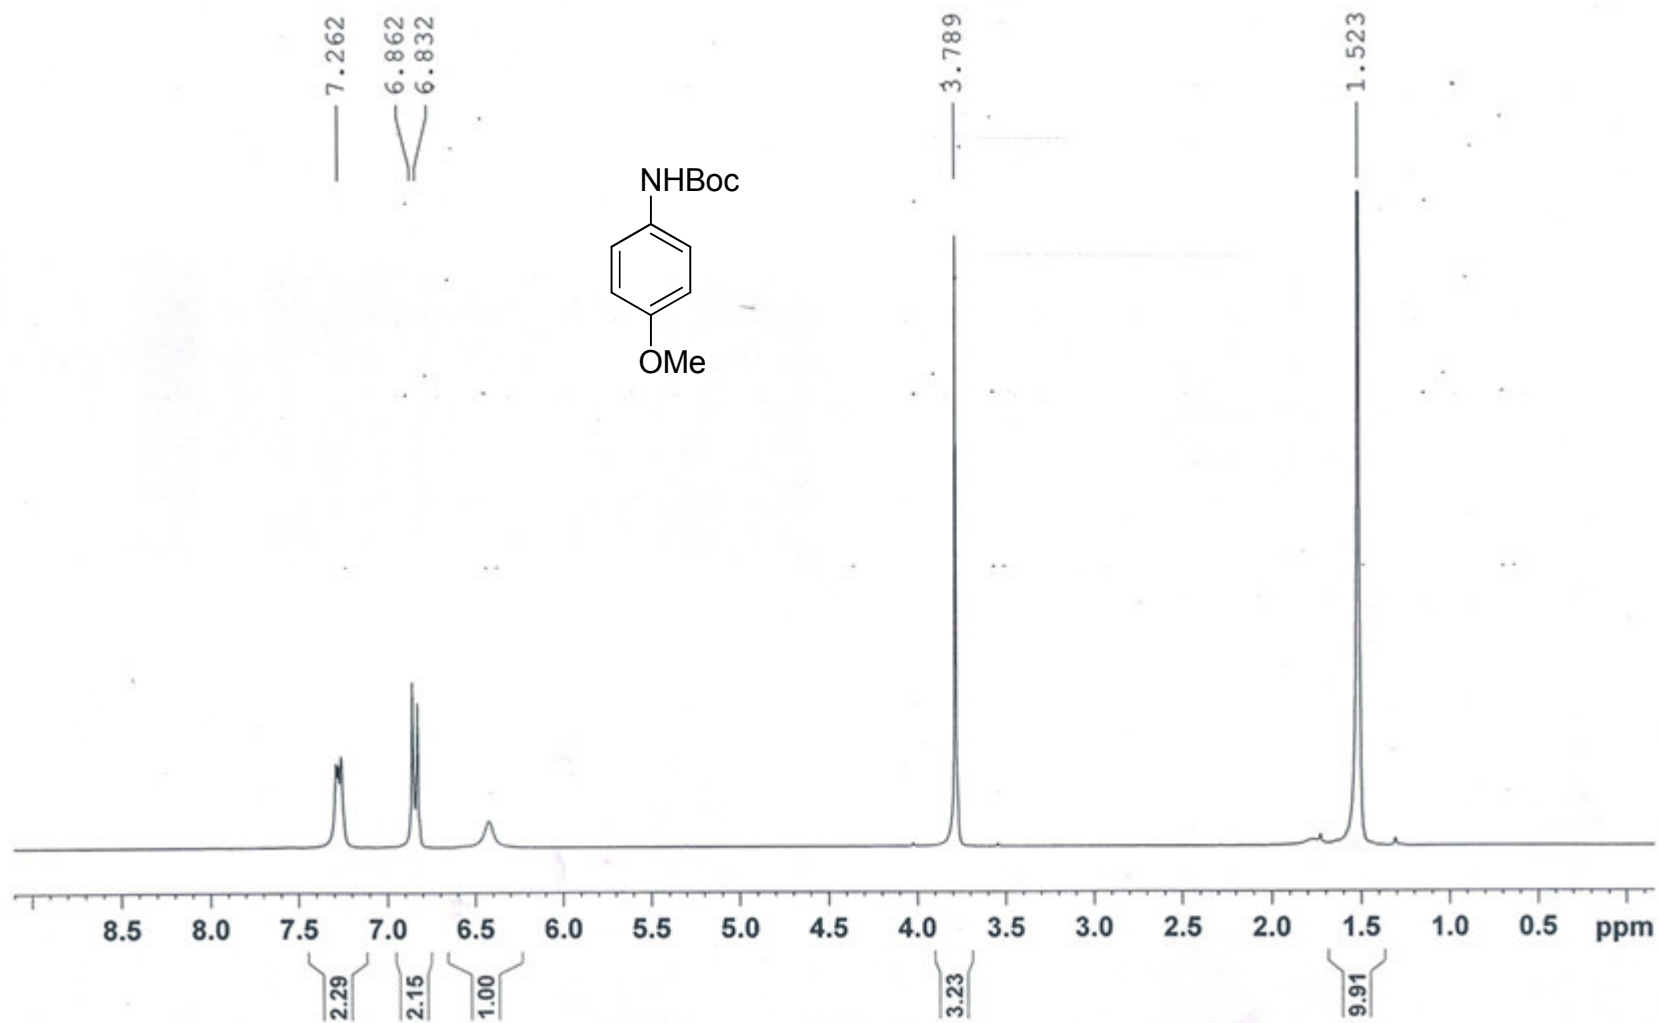

$^1\text{H}$  NMR of **2e** ( $\text{CDCl}_3$ , 300 MHz)

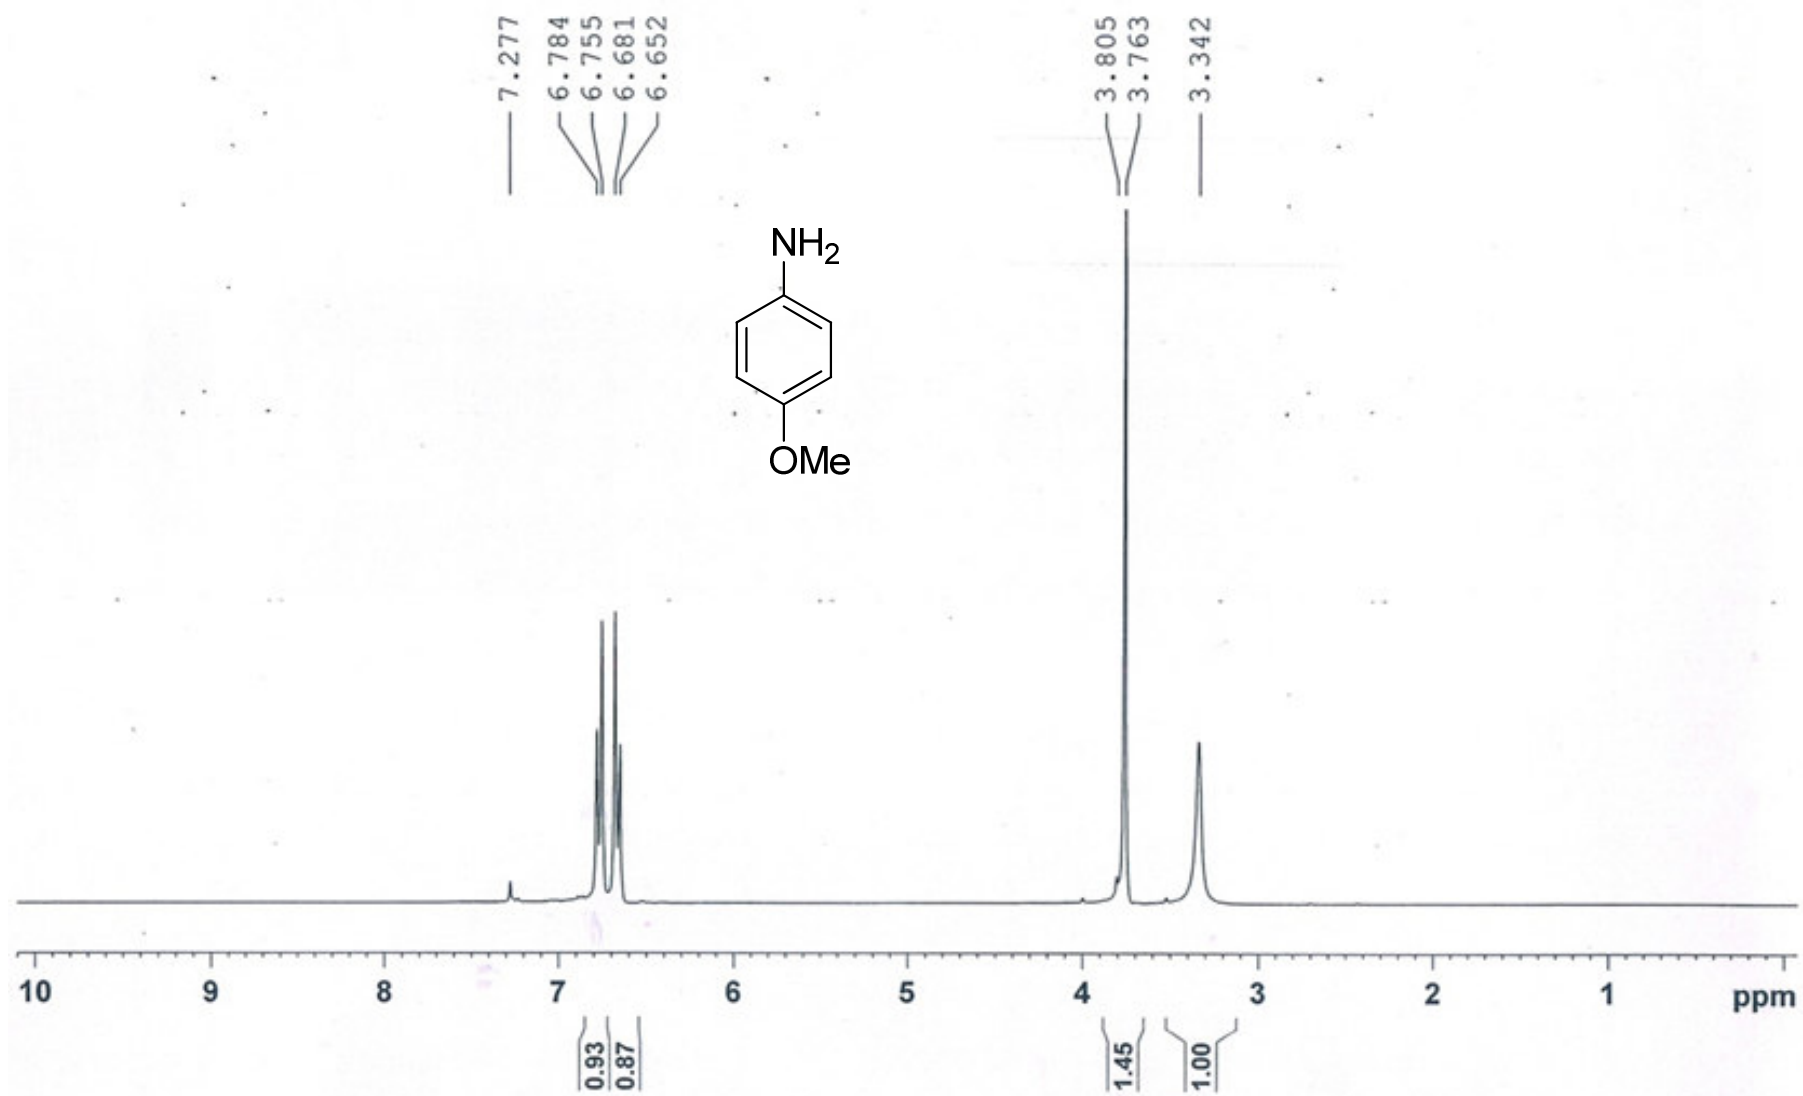

$^1\text{H}$  NMR of **1g** ( $\text{CDCl}_3$ , 300 MHz)

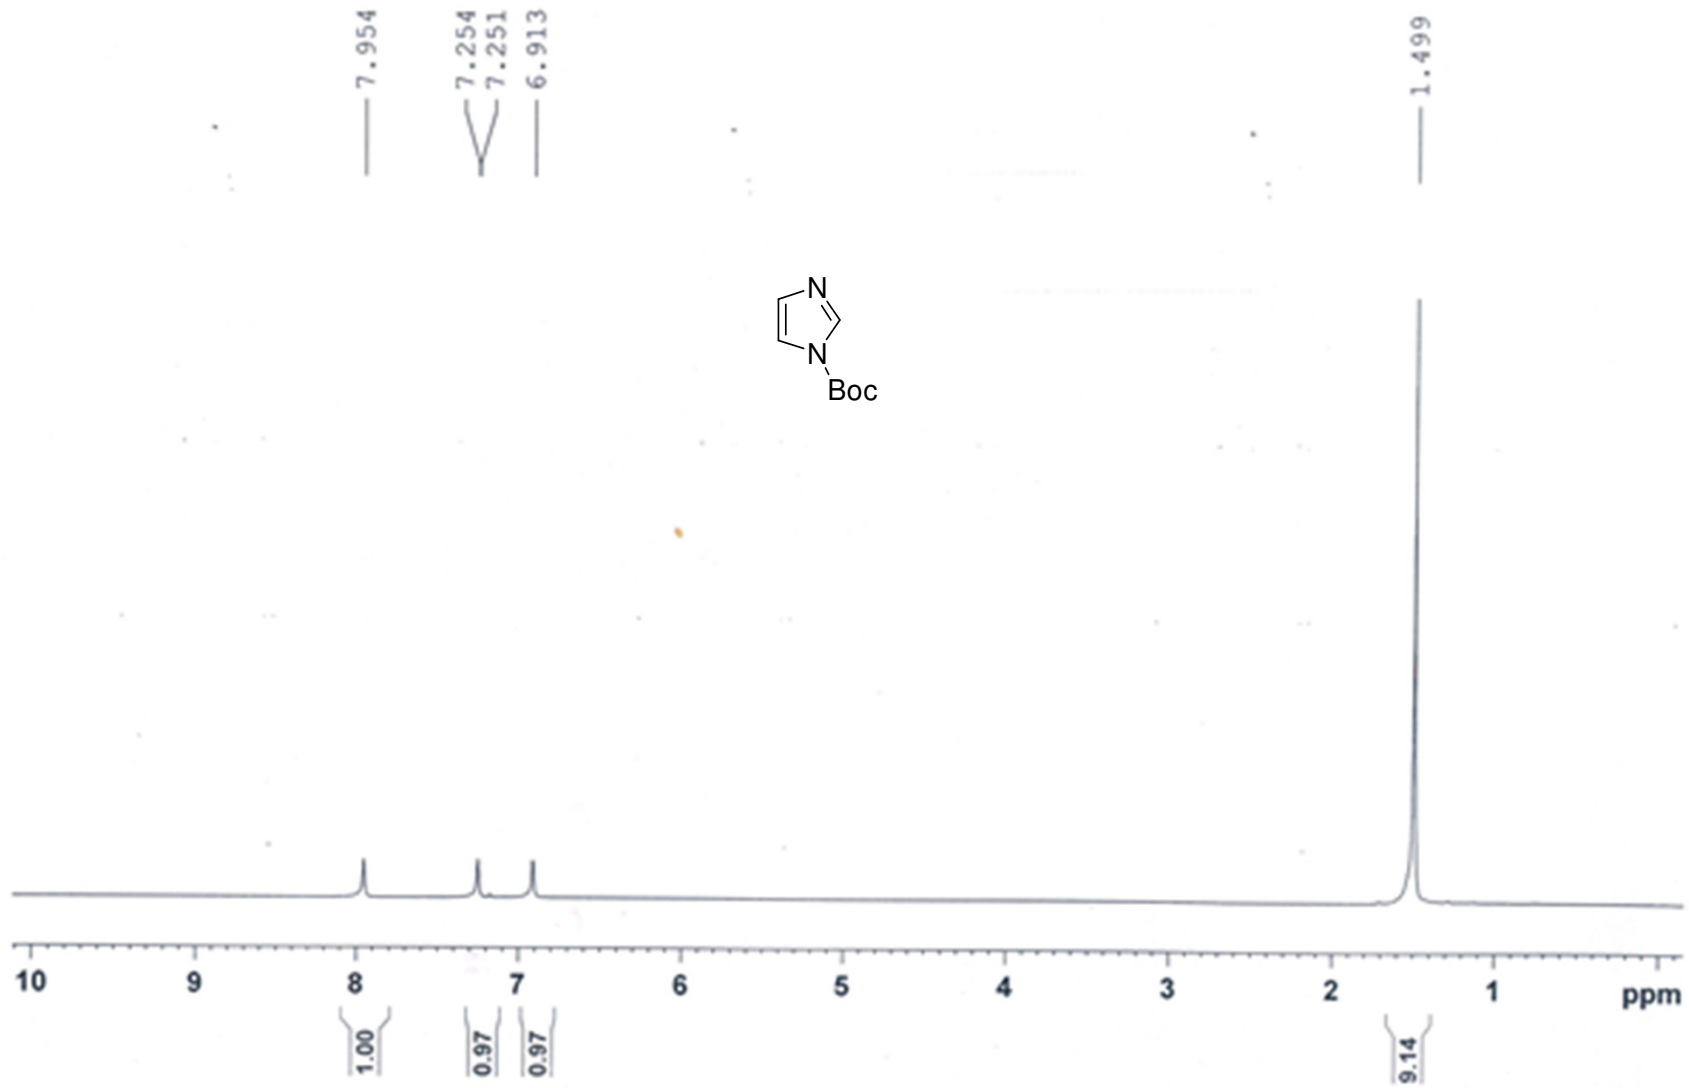

$^{13}\text{C}$  NMR of **1g** ( $\text{CDCl}_3$ , 75 MHz)

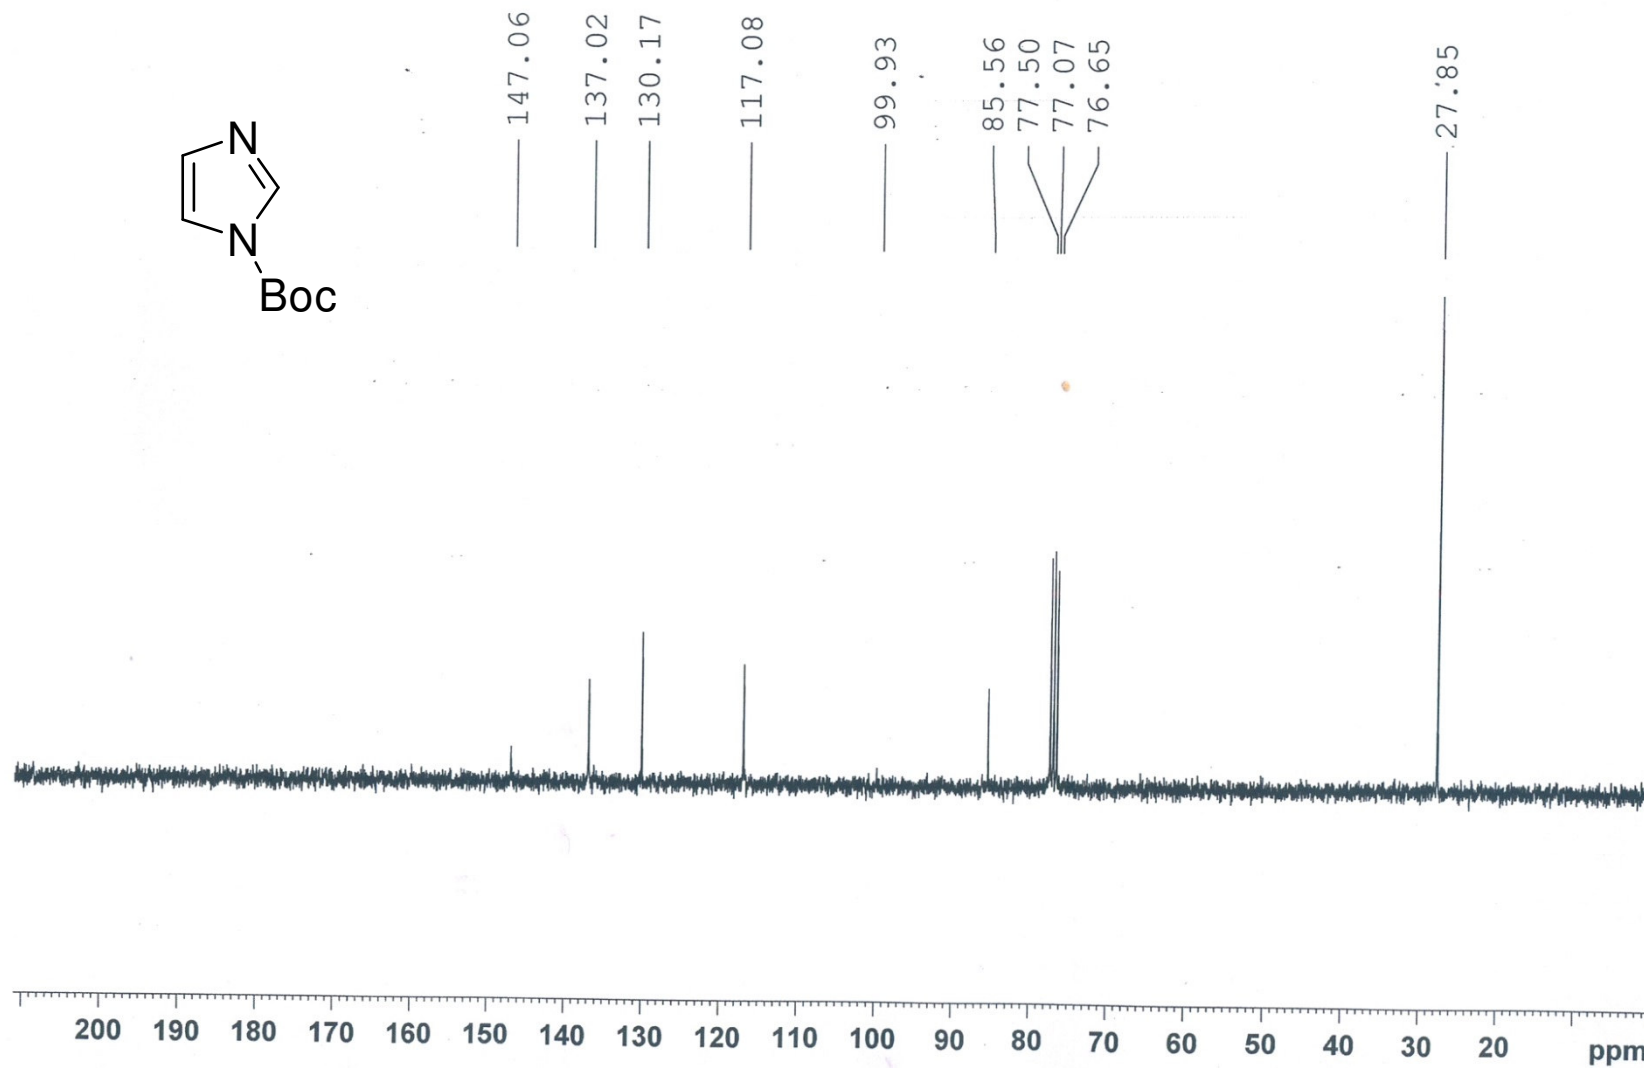

$^1\text{H}$  NMR of **2g** ( $\text{CDCl}_3$ , 300 MHz)

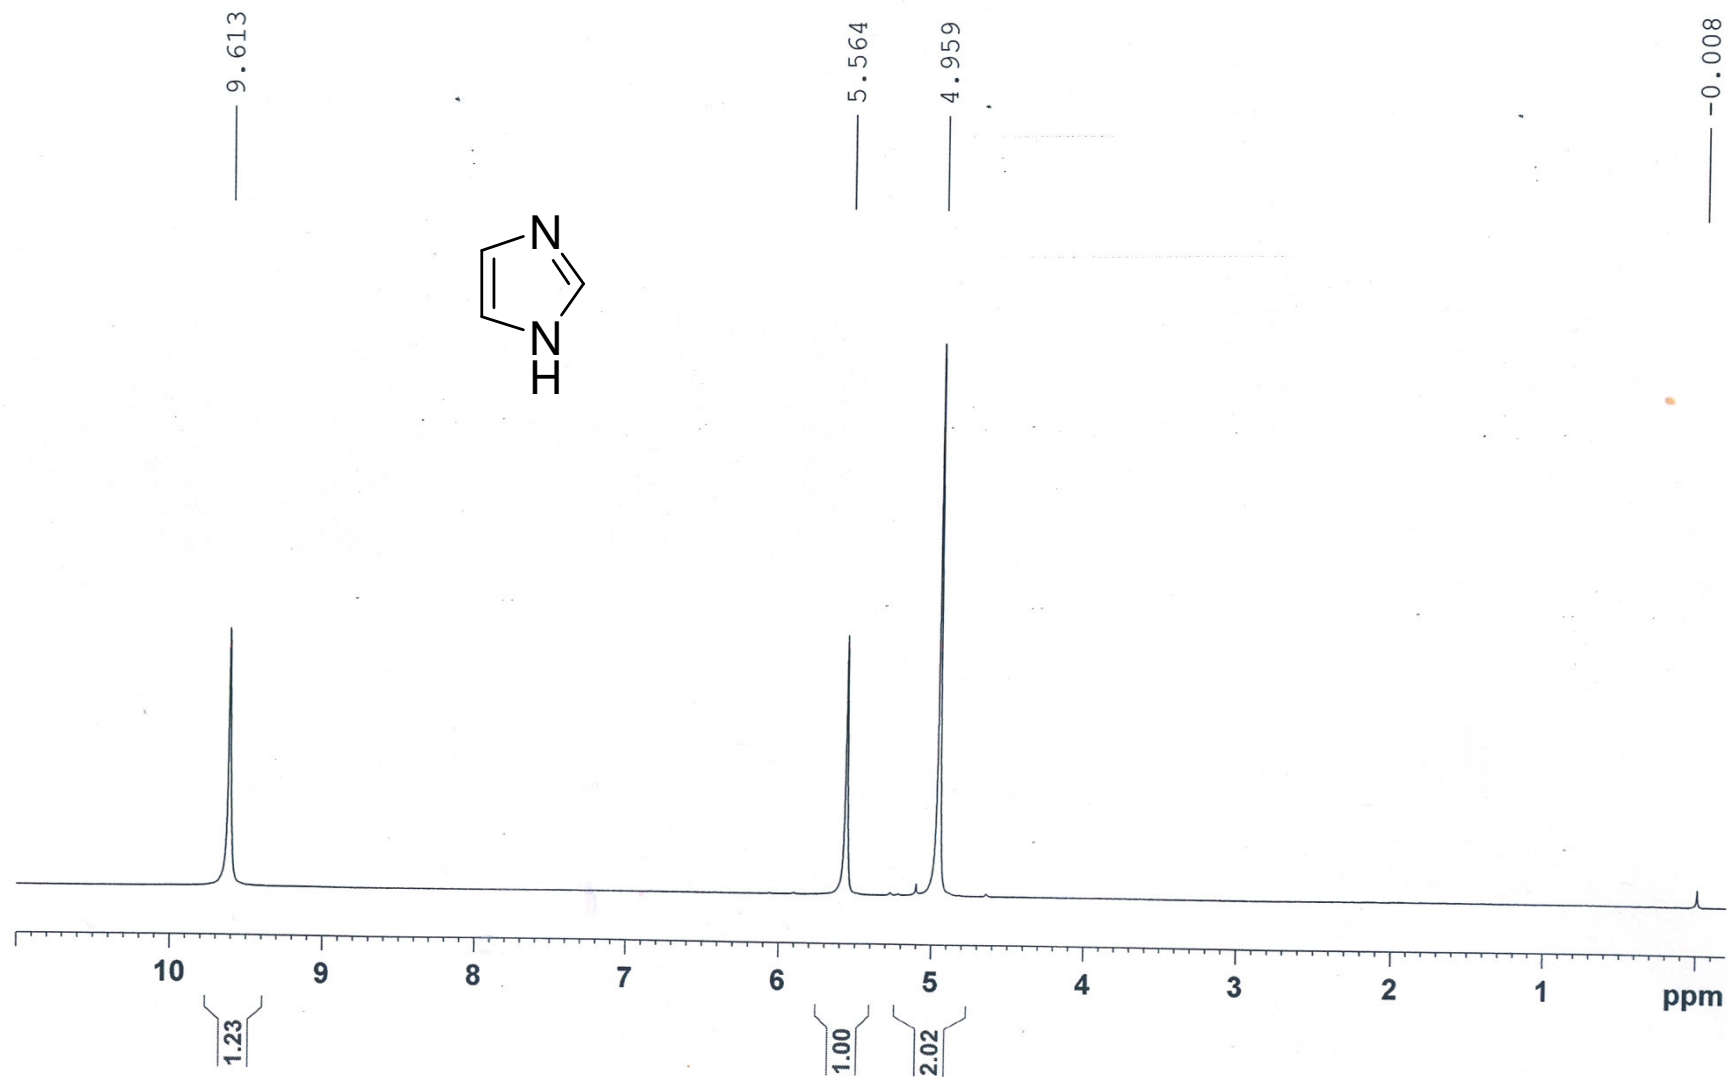

$^1\text{H}$  NMR of **1i** ( $\text{CDCl}_3$ , 300 MHz)

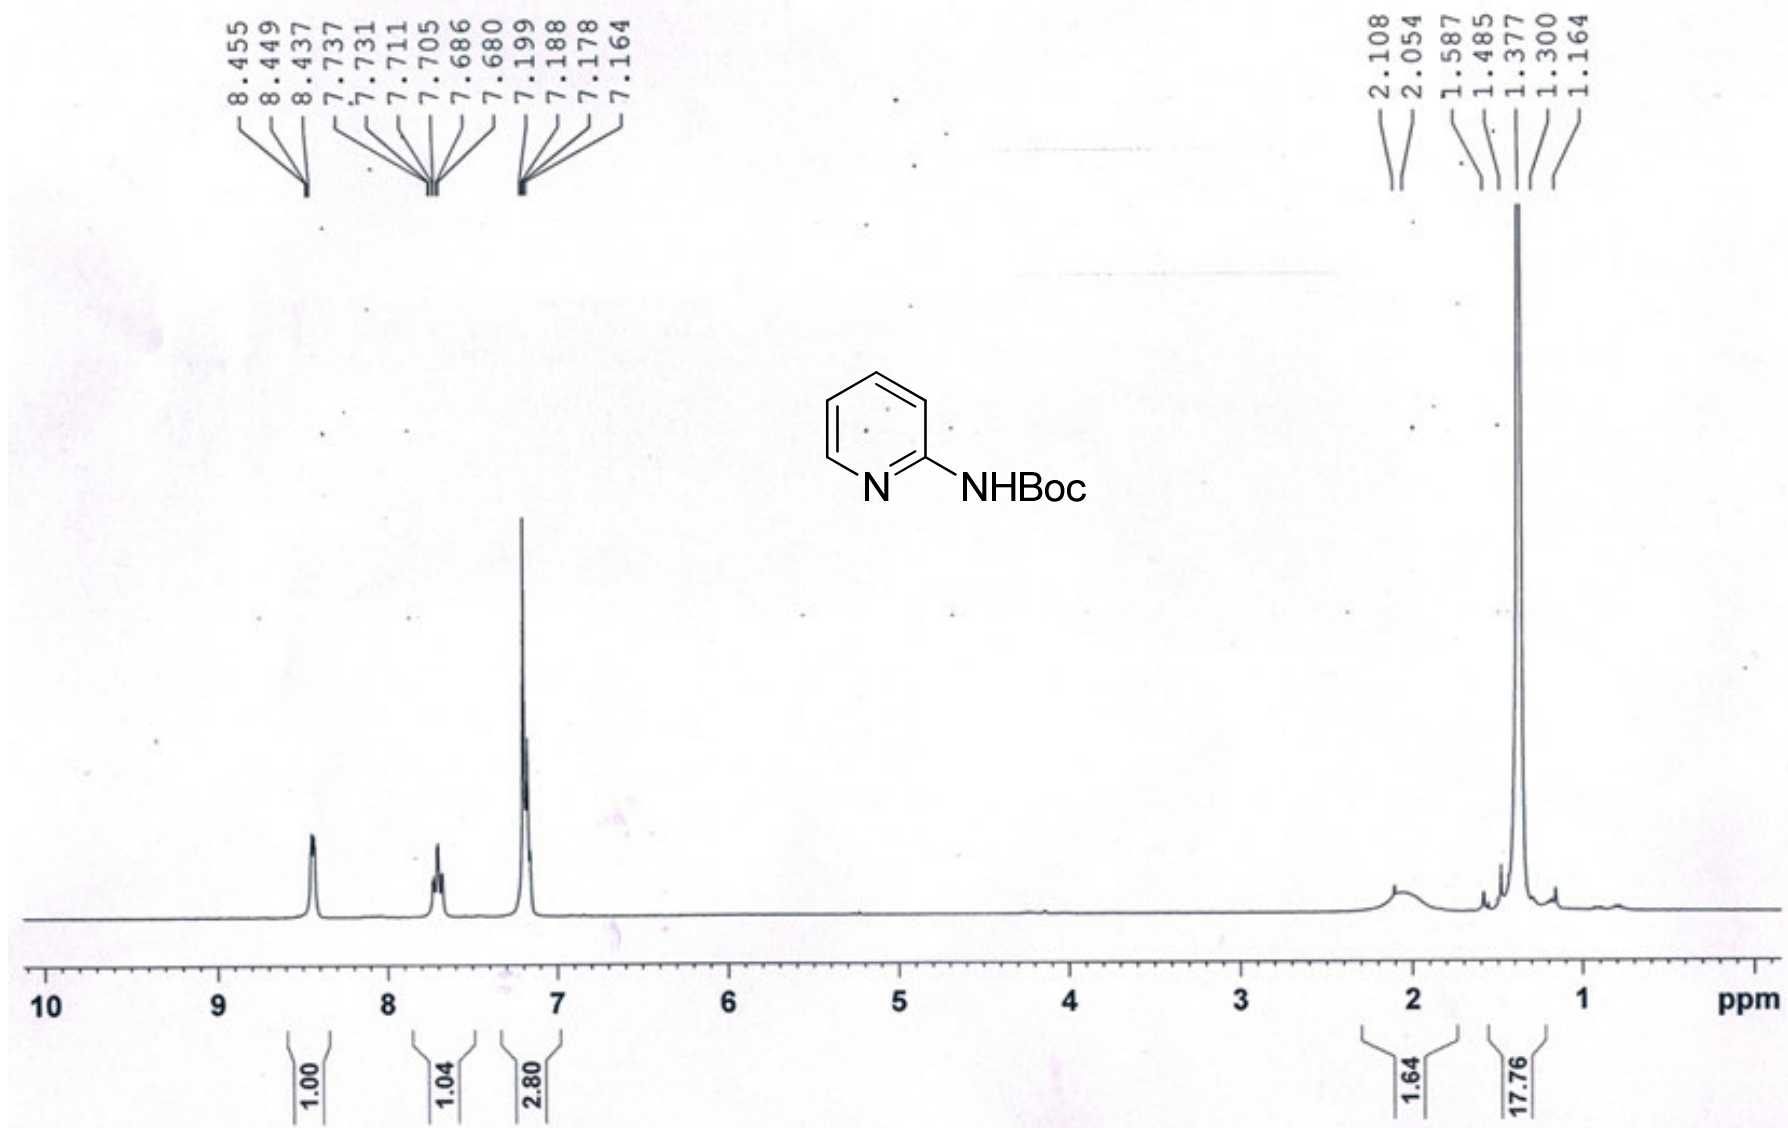

$^1\text{H}$  NMR of **2i** ( $\text{CDCl}_3$ , 300 MHz)

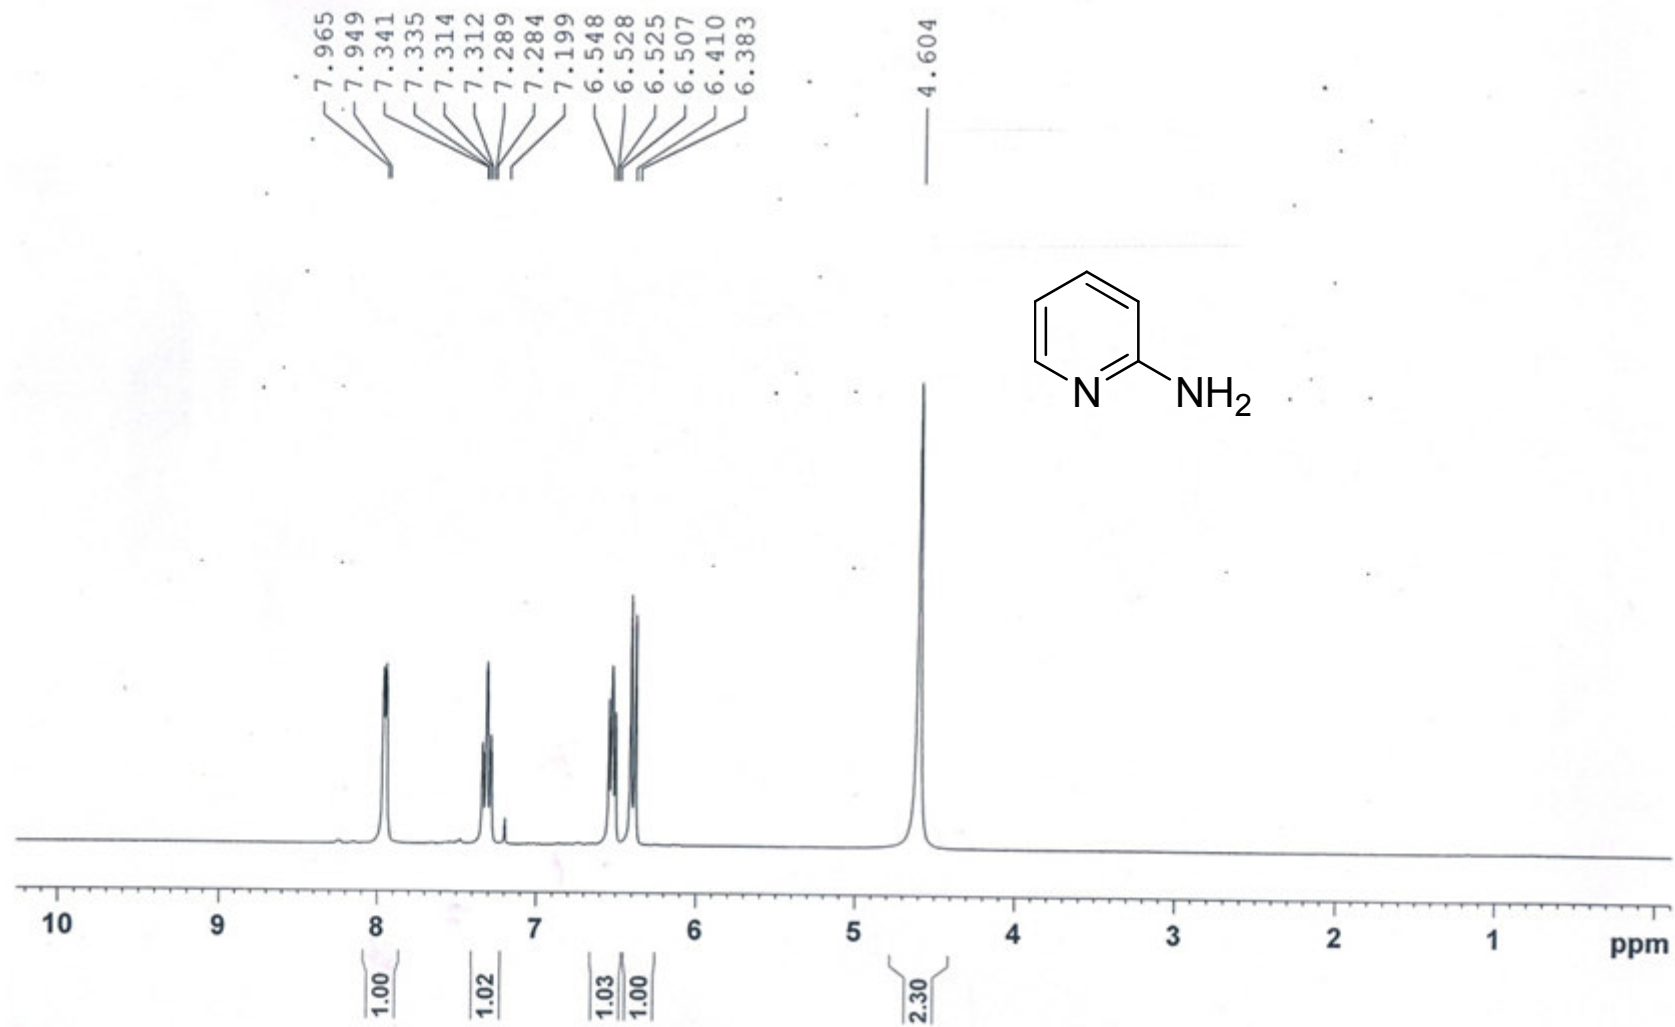



$^1\text{H}$  NMR of **1j** ( $\text{CDCl}_3$ , 300 MHz)

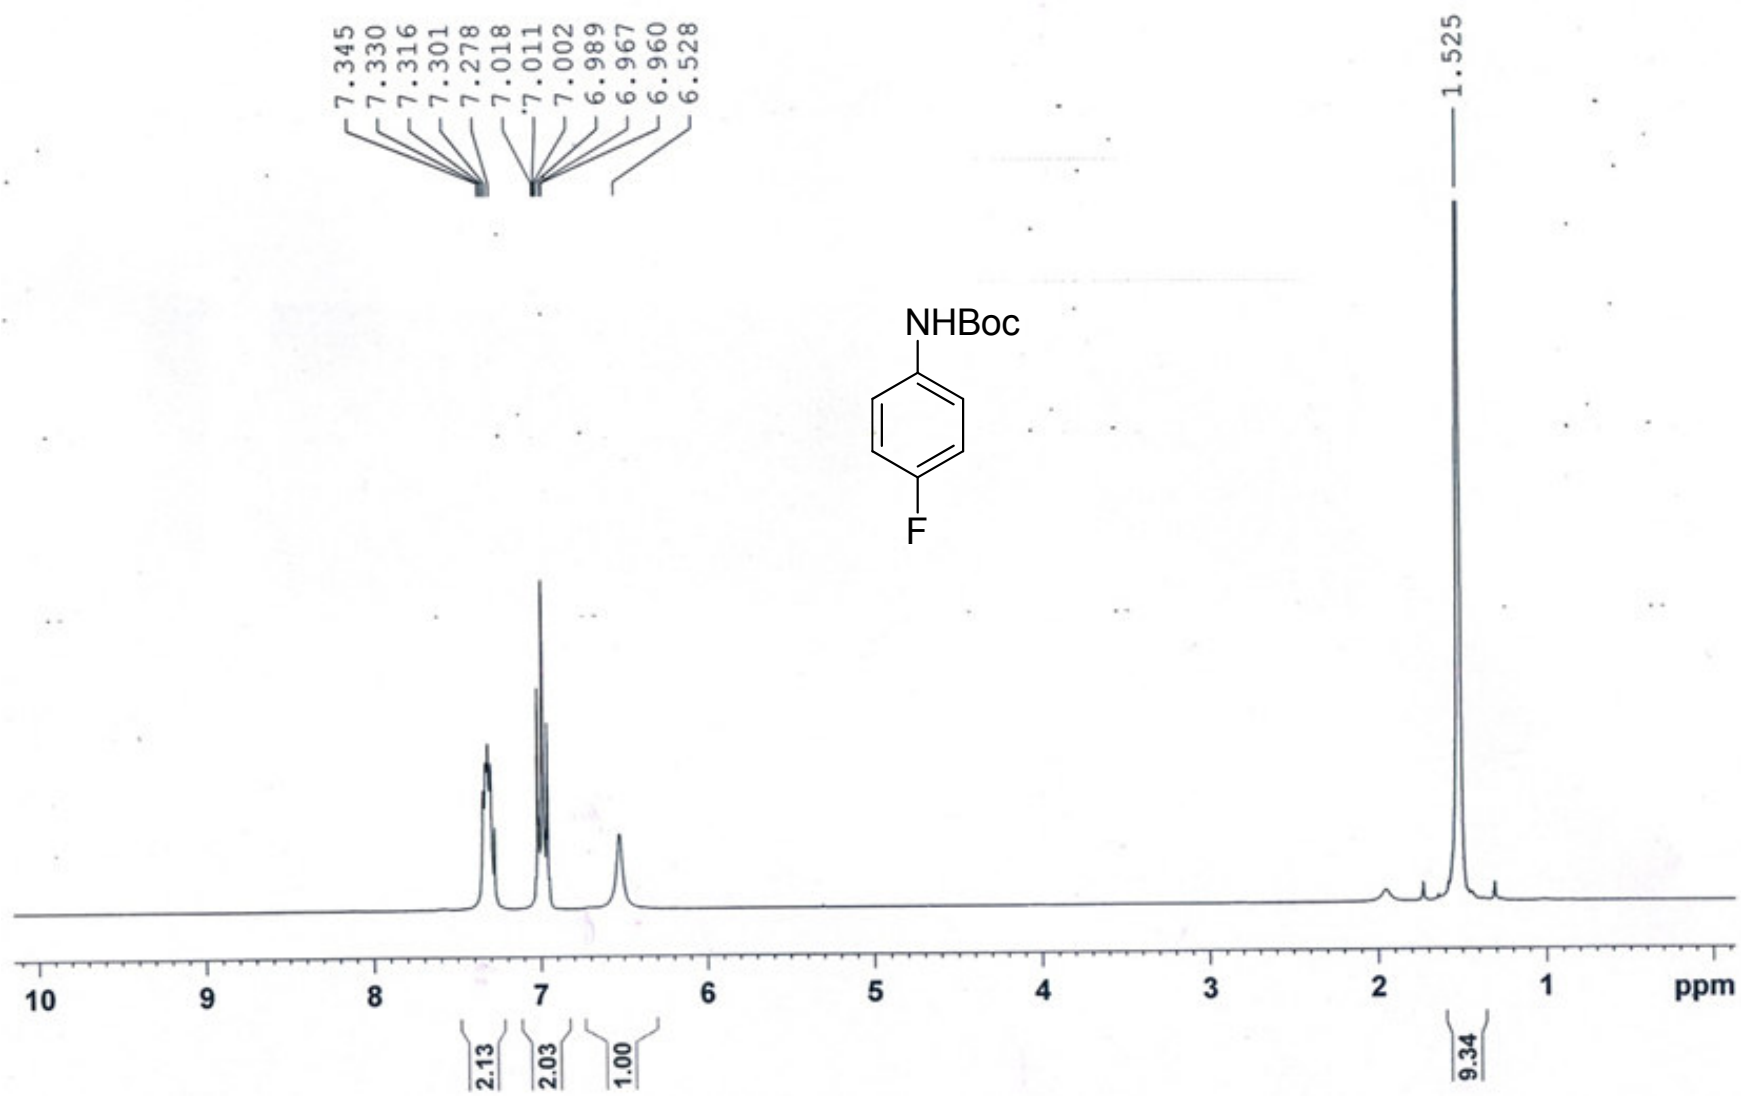

$^1\text{H}$  NMR of **2j** (DMSO- $d_6$ , 300 MHz)

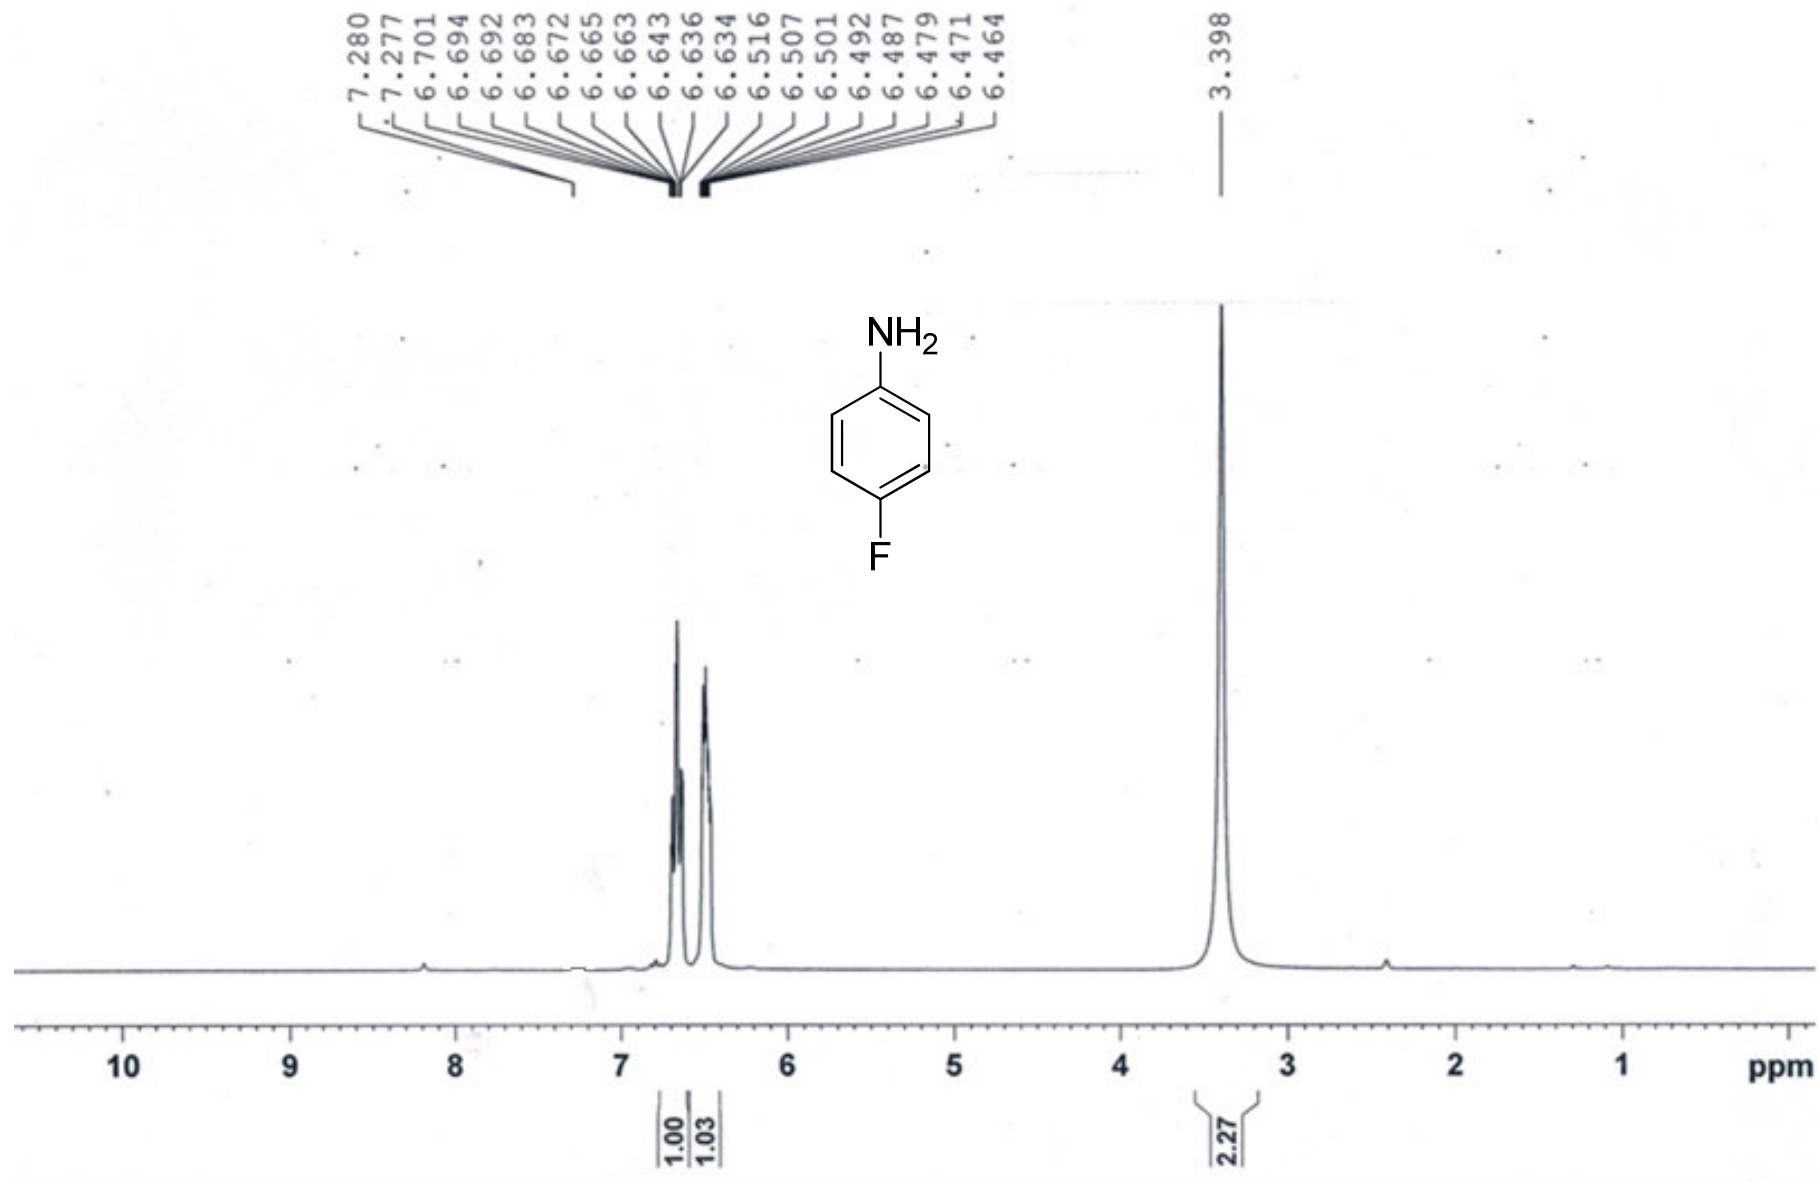

$^1\text{H}$  NMR of **3d** ( $\text{CDCl}_3$ , 300 MHz)

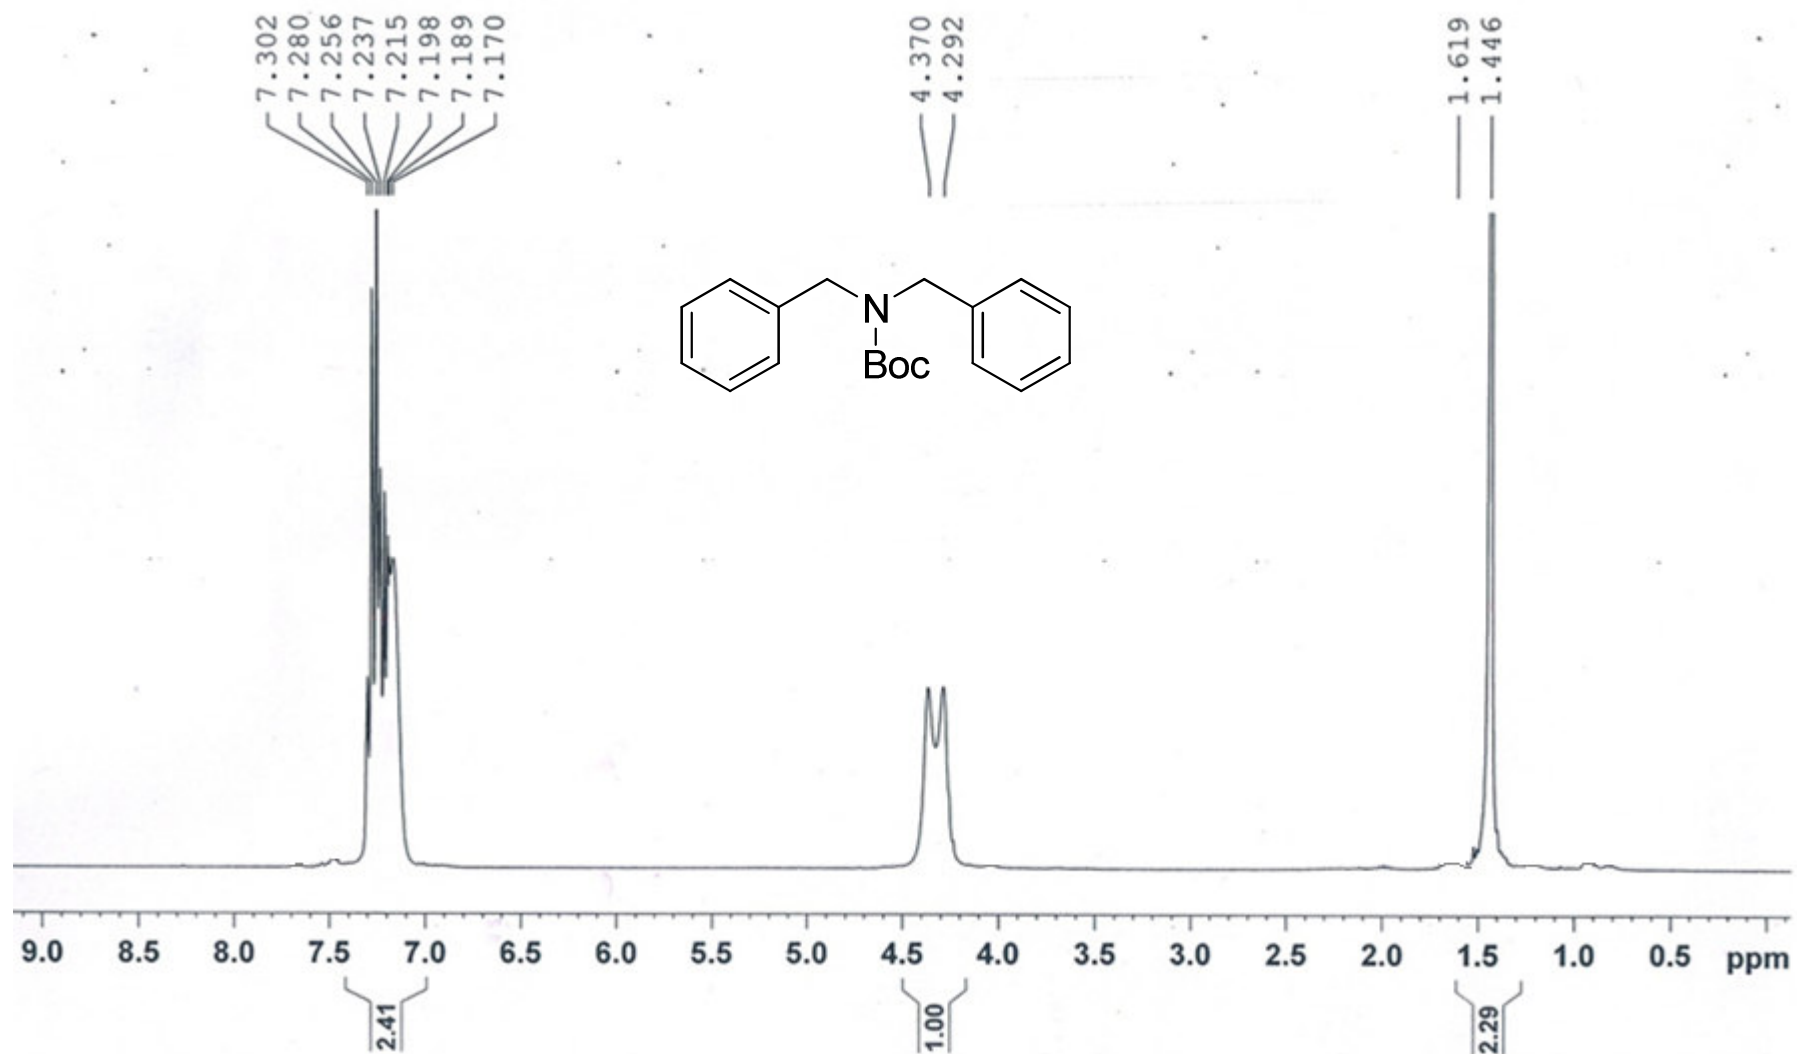

$^1\text{H}$  NMR of **4d** ( $\text{CDCl}_3$ , 300 MHz)

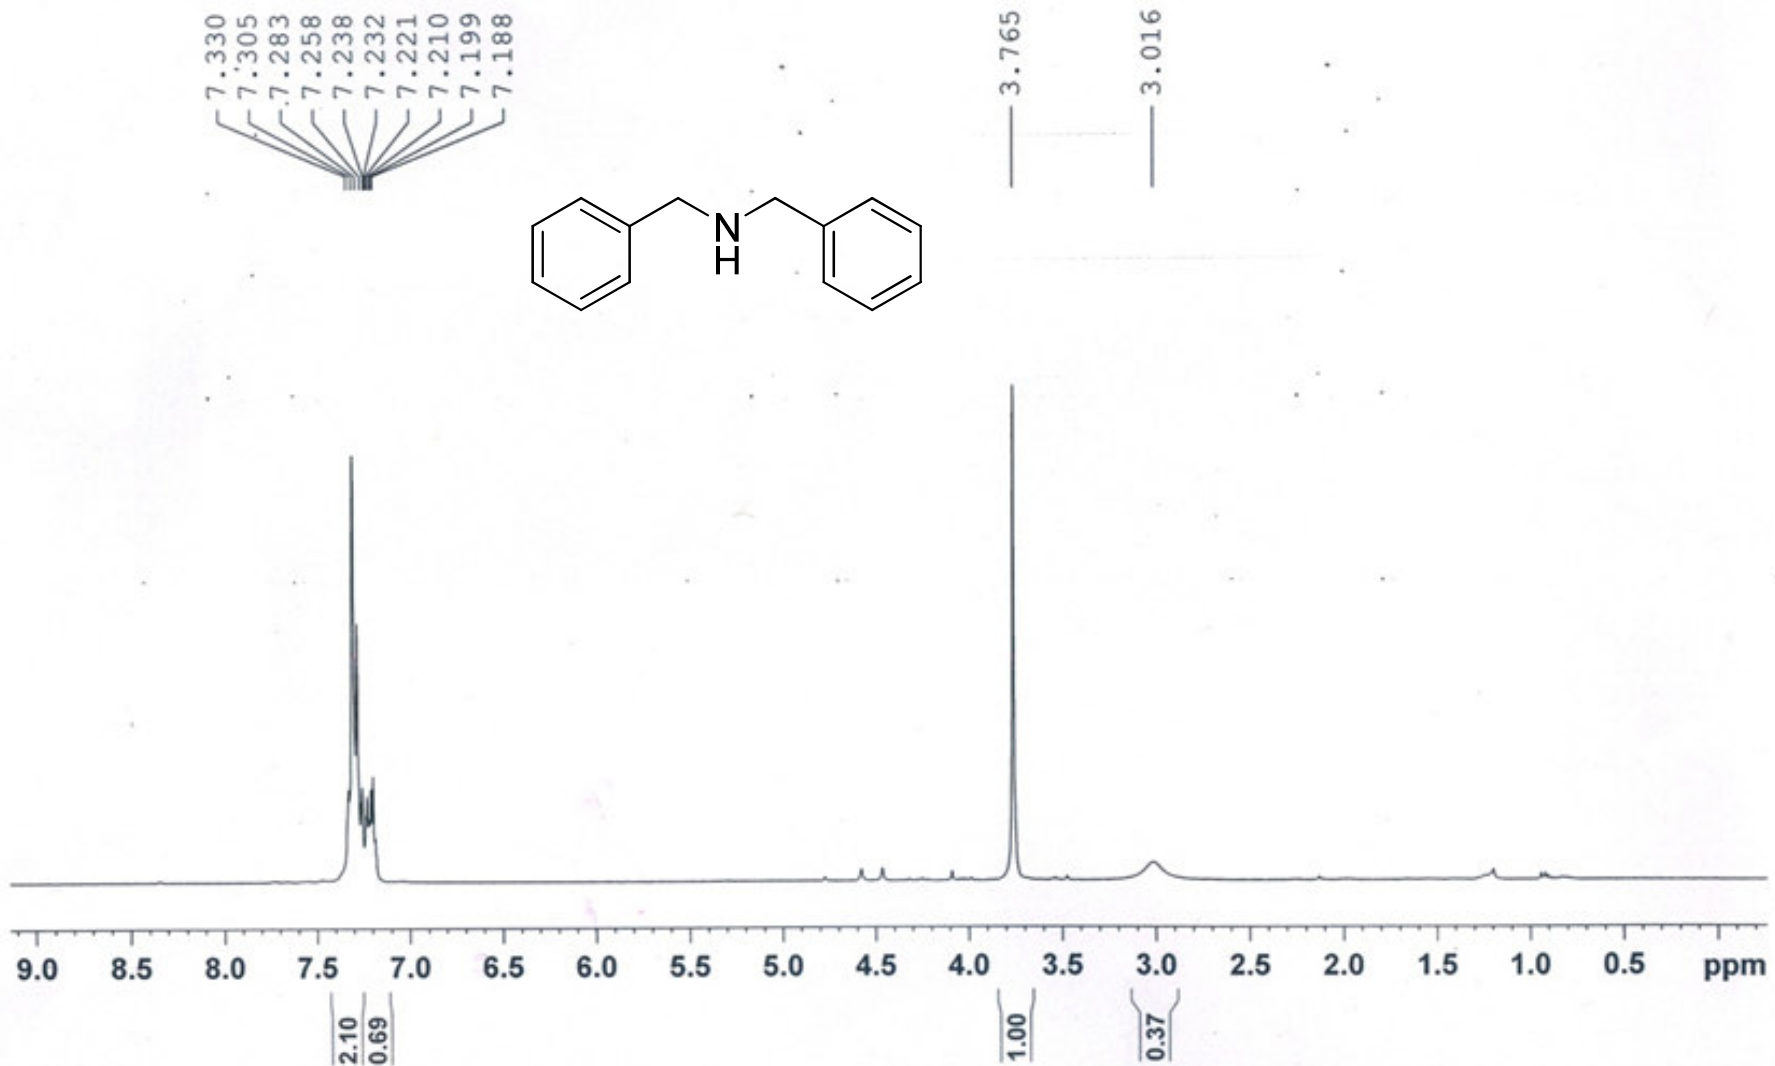

$^1\text{H}$  NMR of **3e** ( $\text{CDCl}_3$ , 300 MHz)

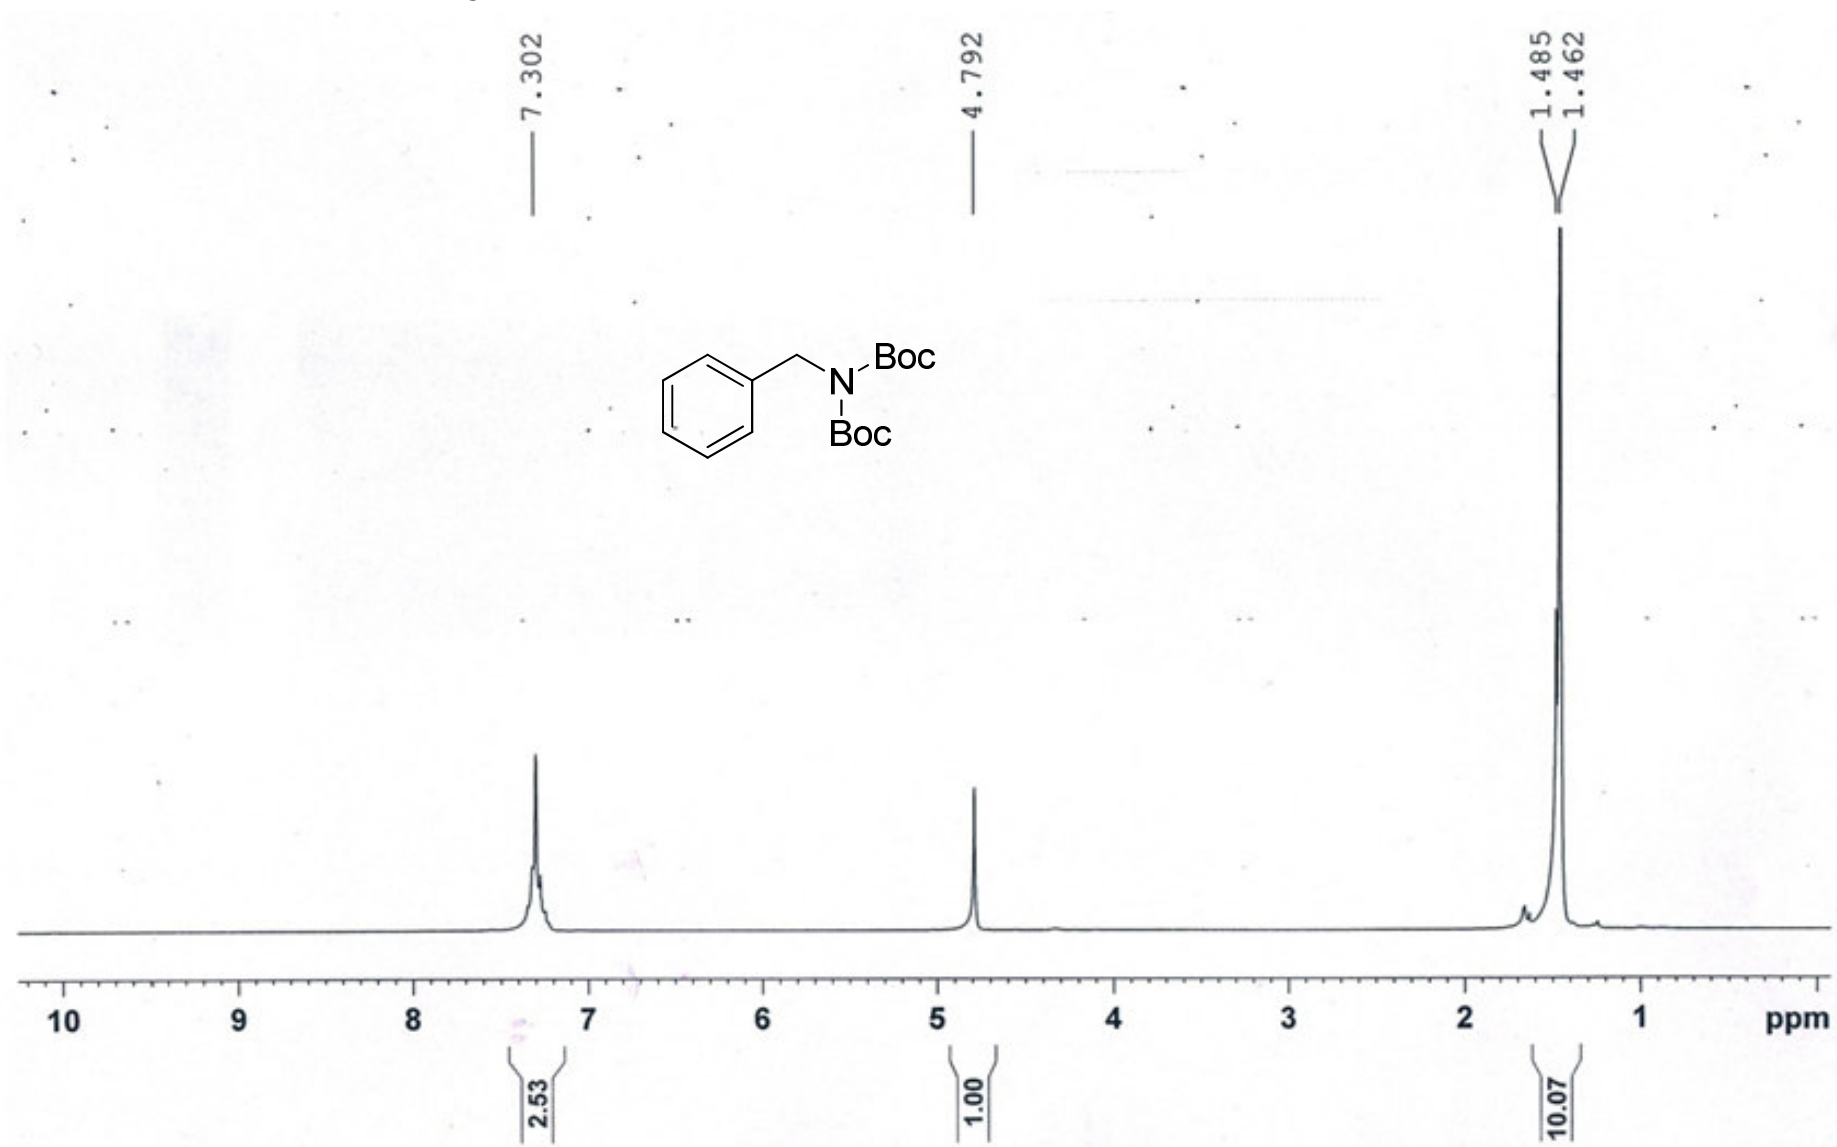

$^1\text{H}$  NMR of **8c** ( $\text{CDCl}_3$ , 300 MHz)

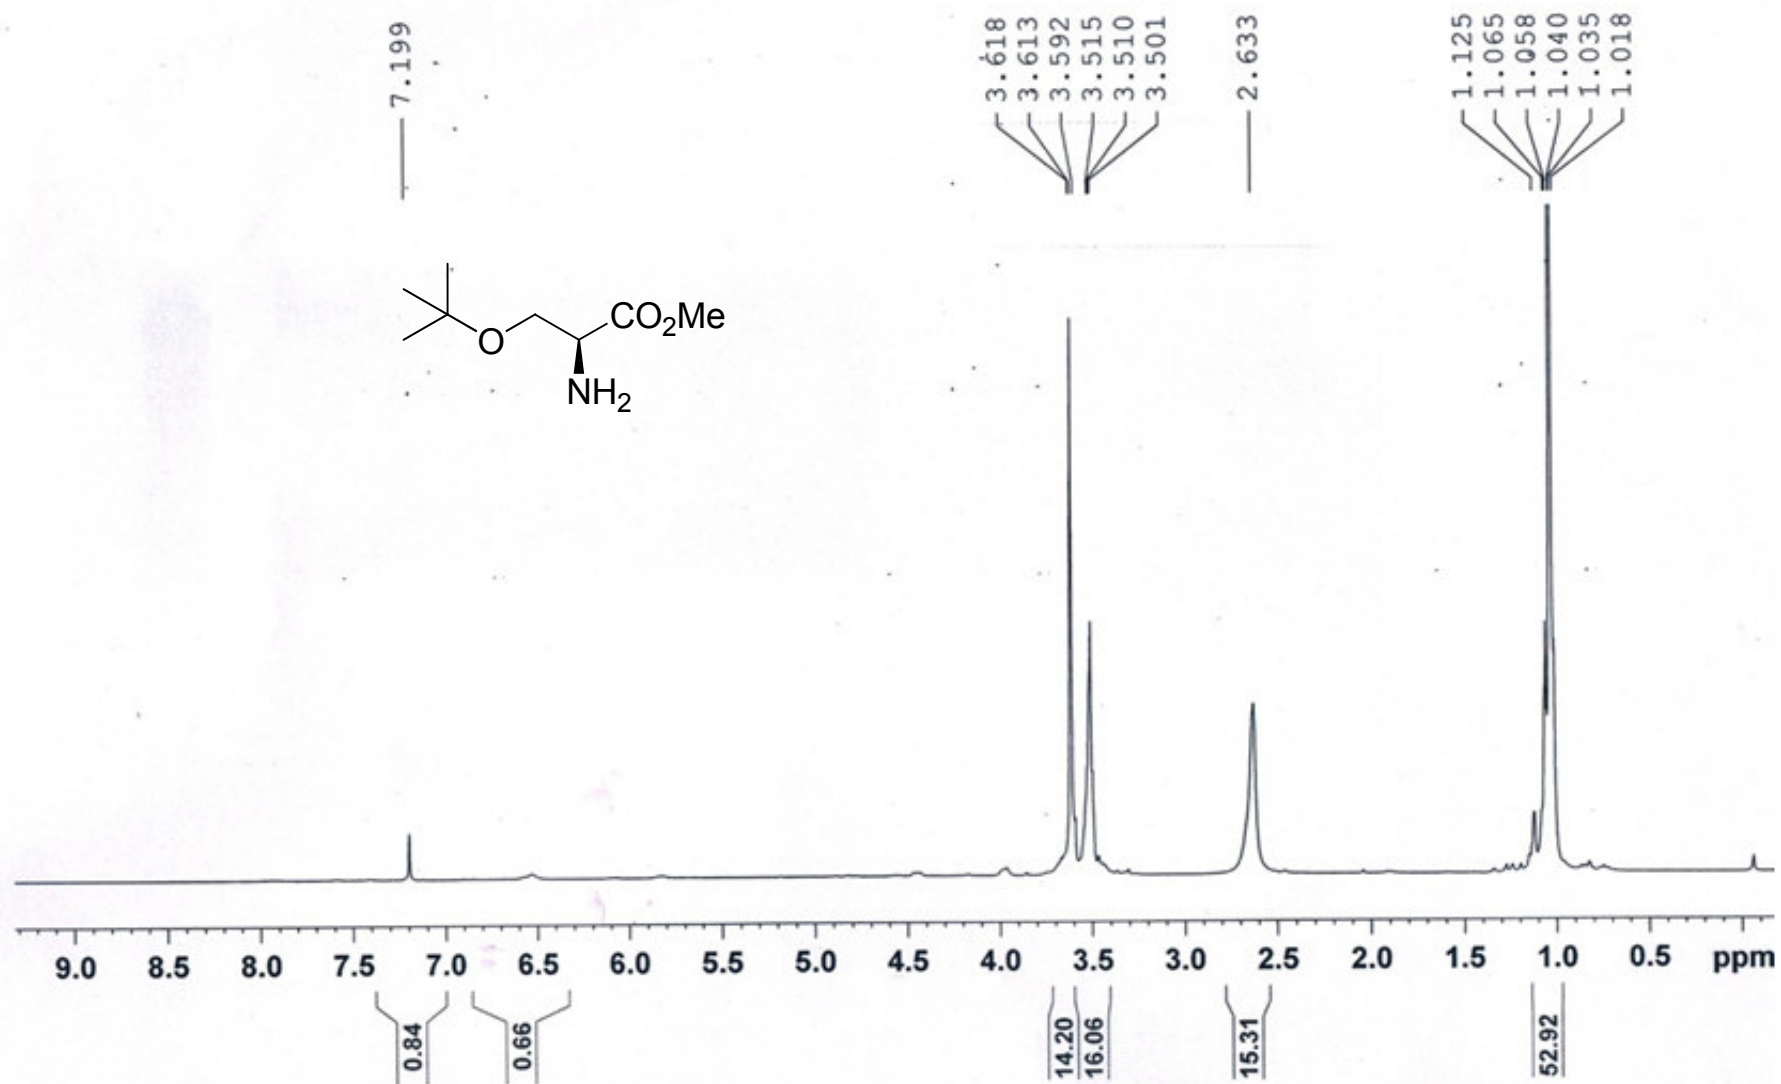

$^1\text{H}$  NMR of **7g** ( $\text{CDCl}_3$ , 300 MHz)

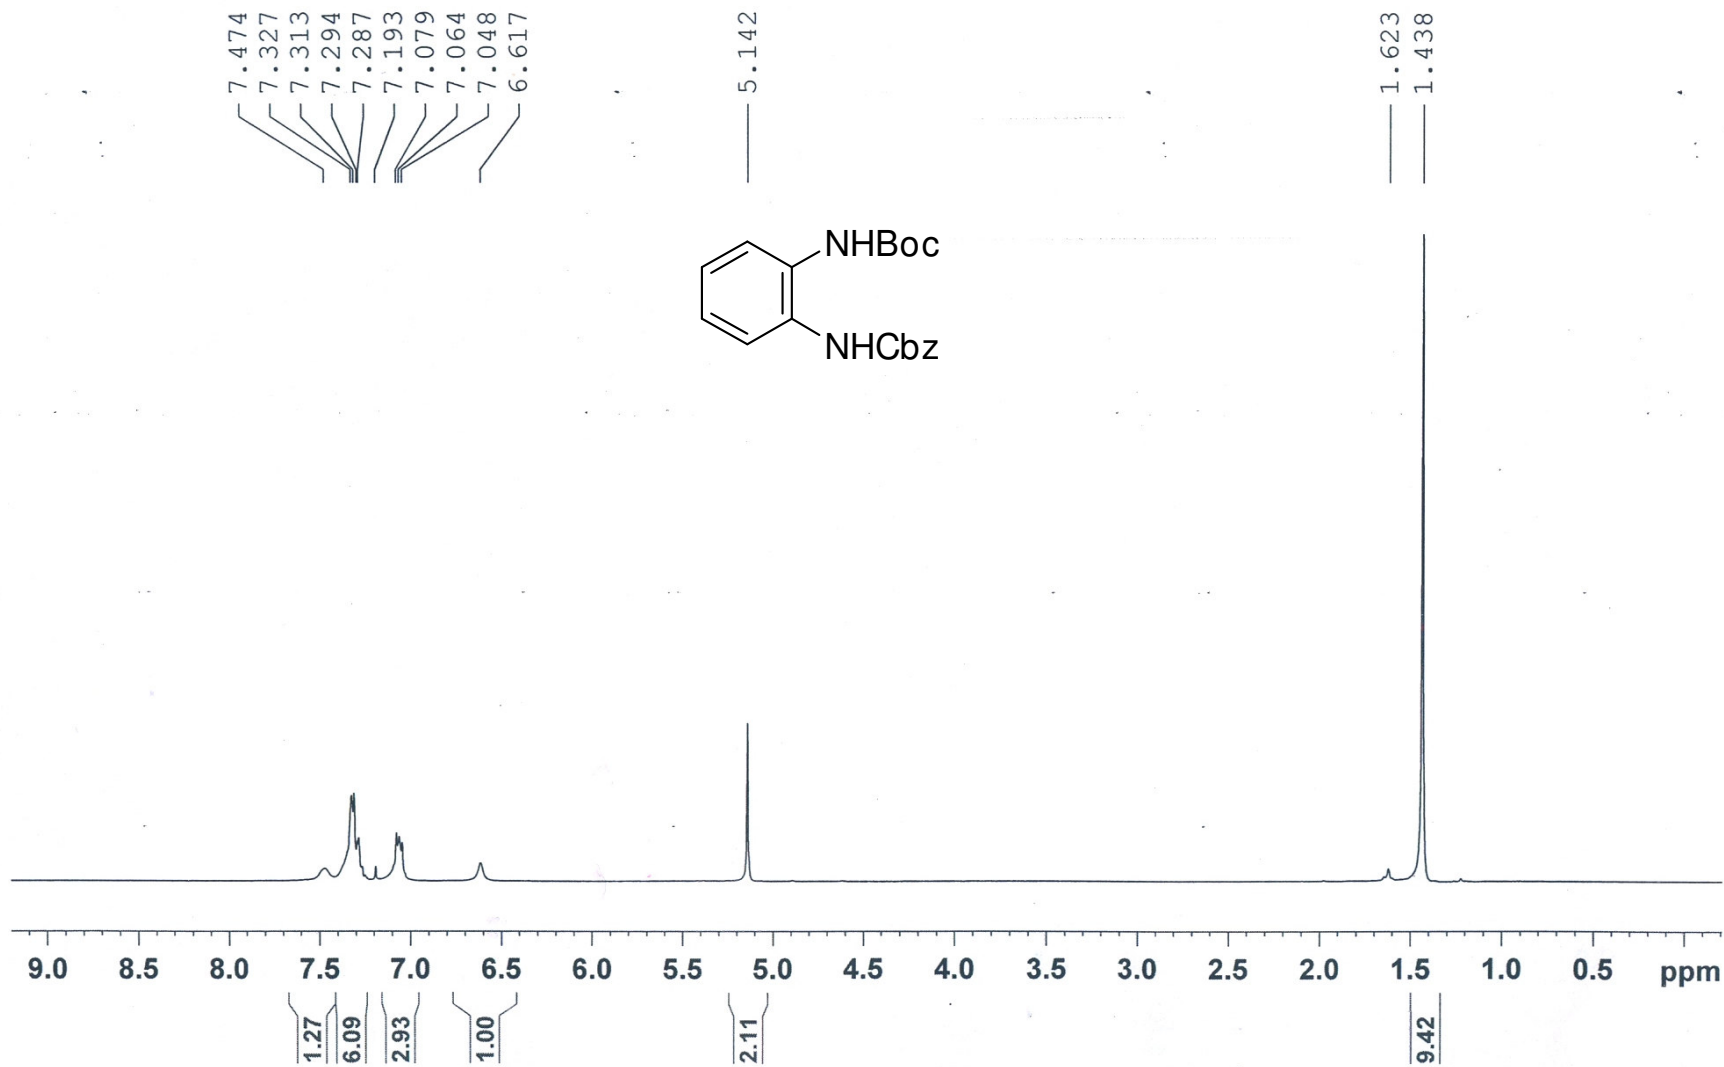

$^{13}\text{C}$  NMR of **7g** ( $\text{CDCl}_3$ , 75 MHz)

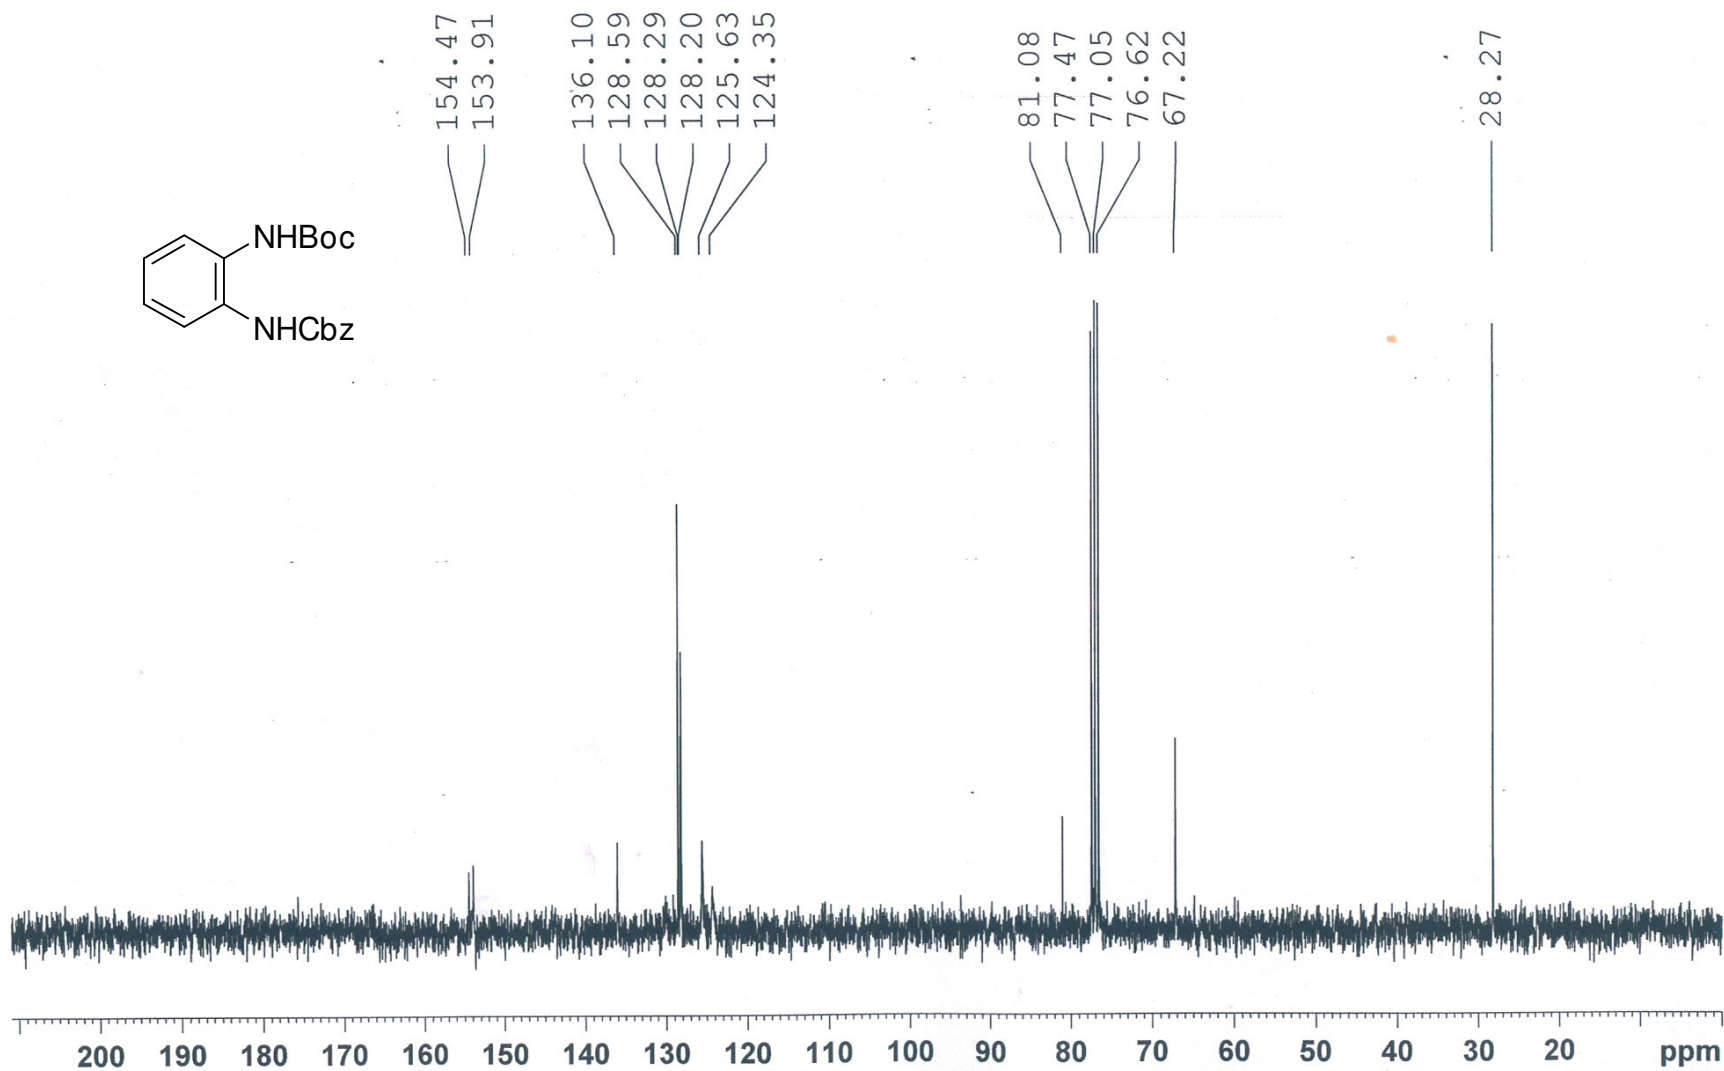



$^1\text{H}$  NMR of **8g** ( $\text{CDCl}_3$ , 300 MHz)

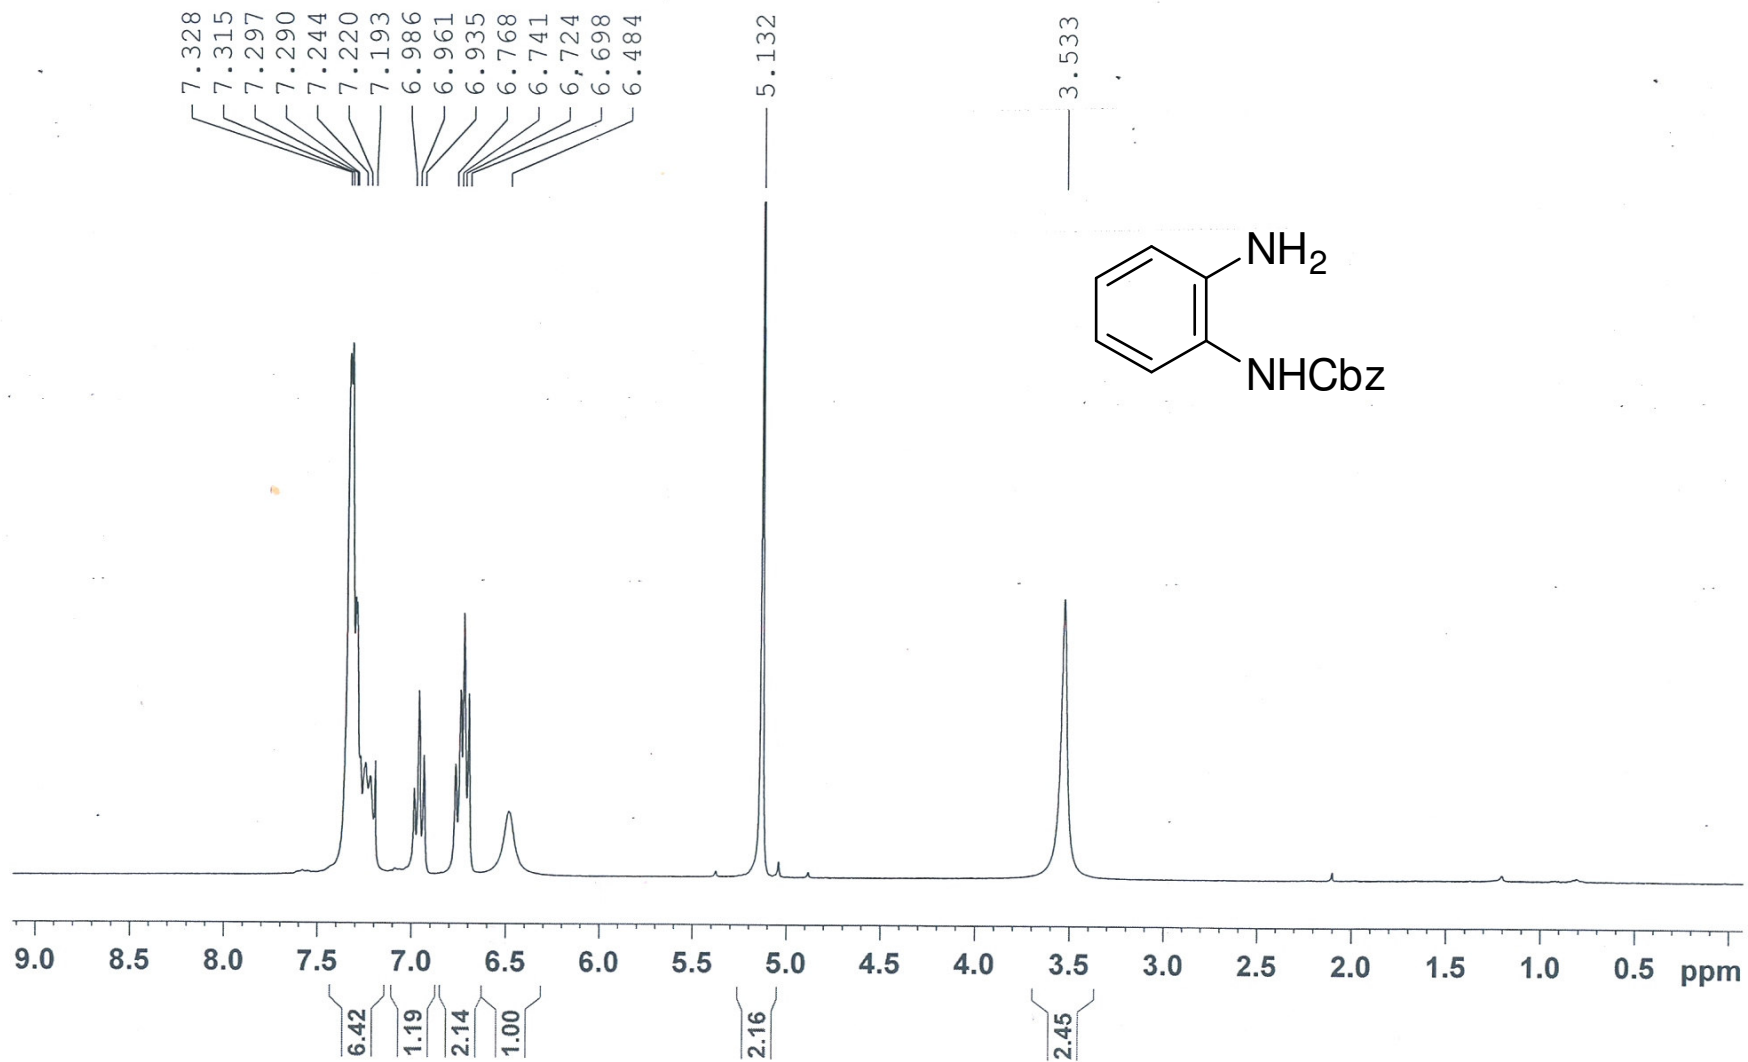

$^{13}\text{C}$  NMR of **8g** ( $\text{CDCl}_3$ , 300 MHz)

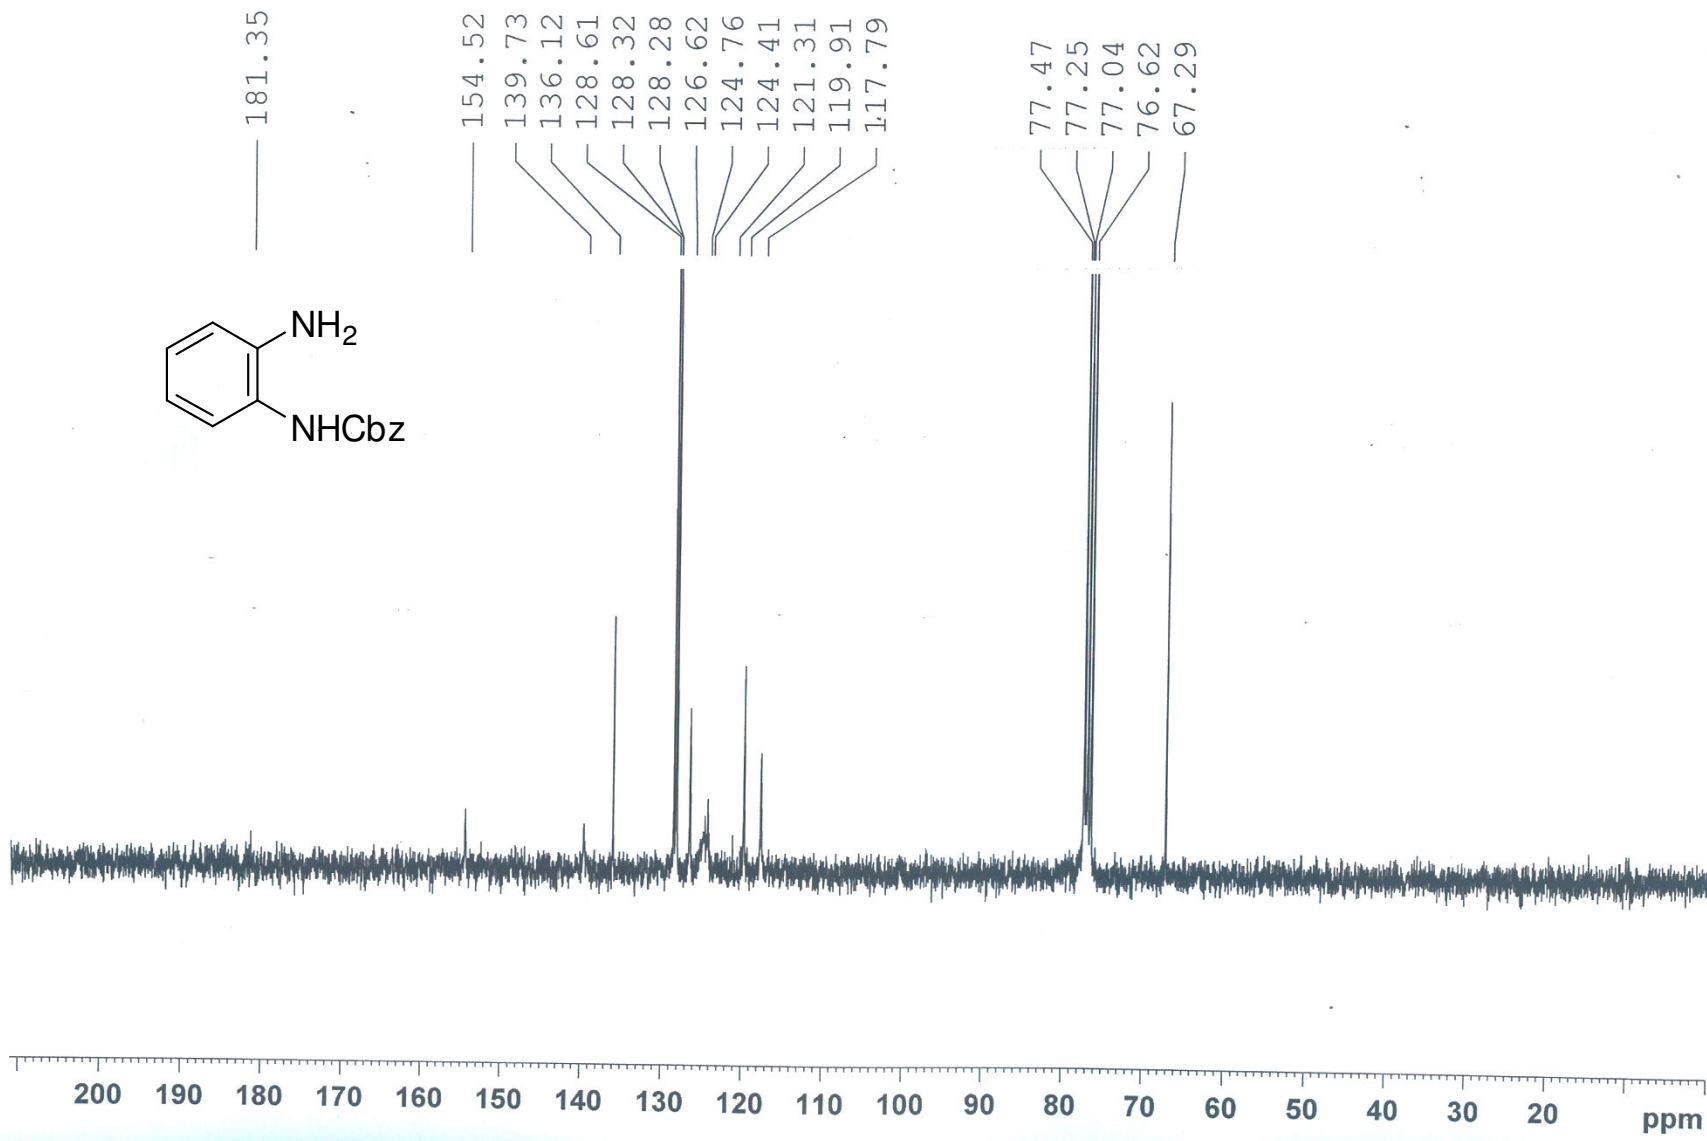

$^1\text{H}$  NMR of **7h** ( $\text{CDCl}_3$ , 300 MHz)

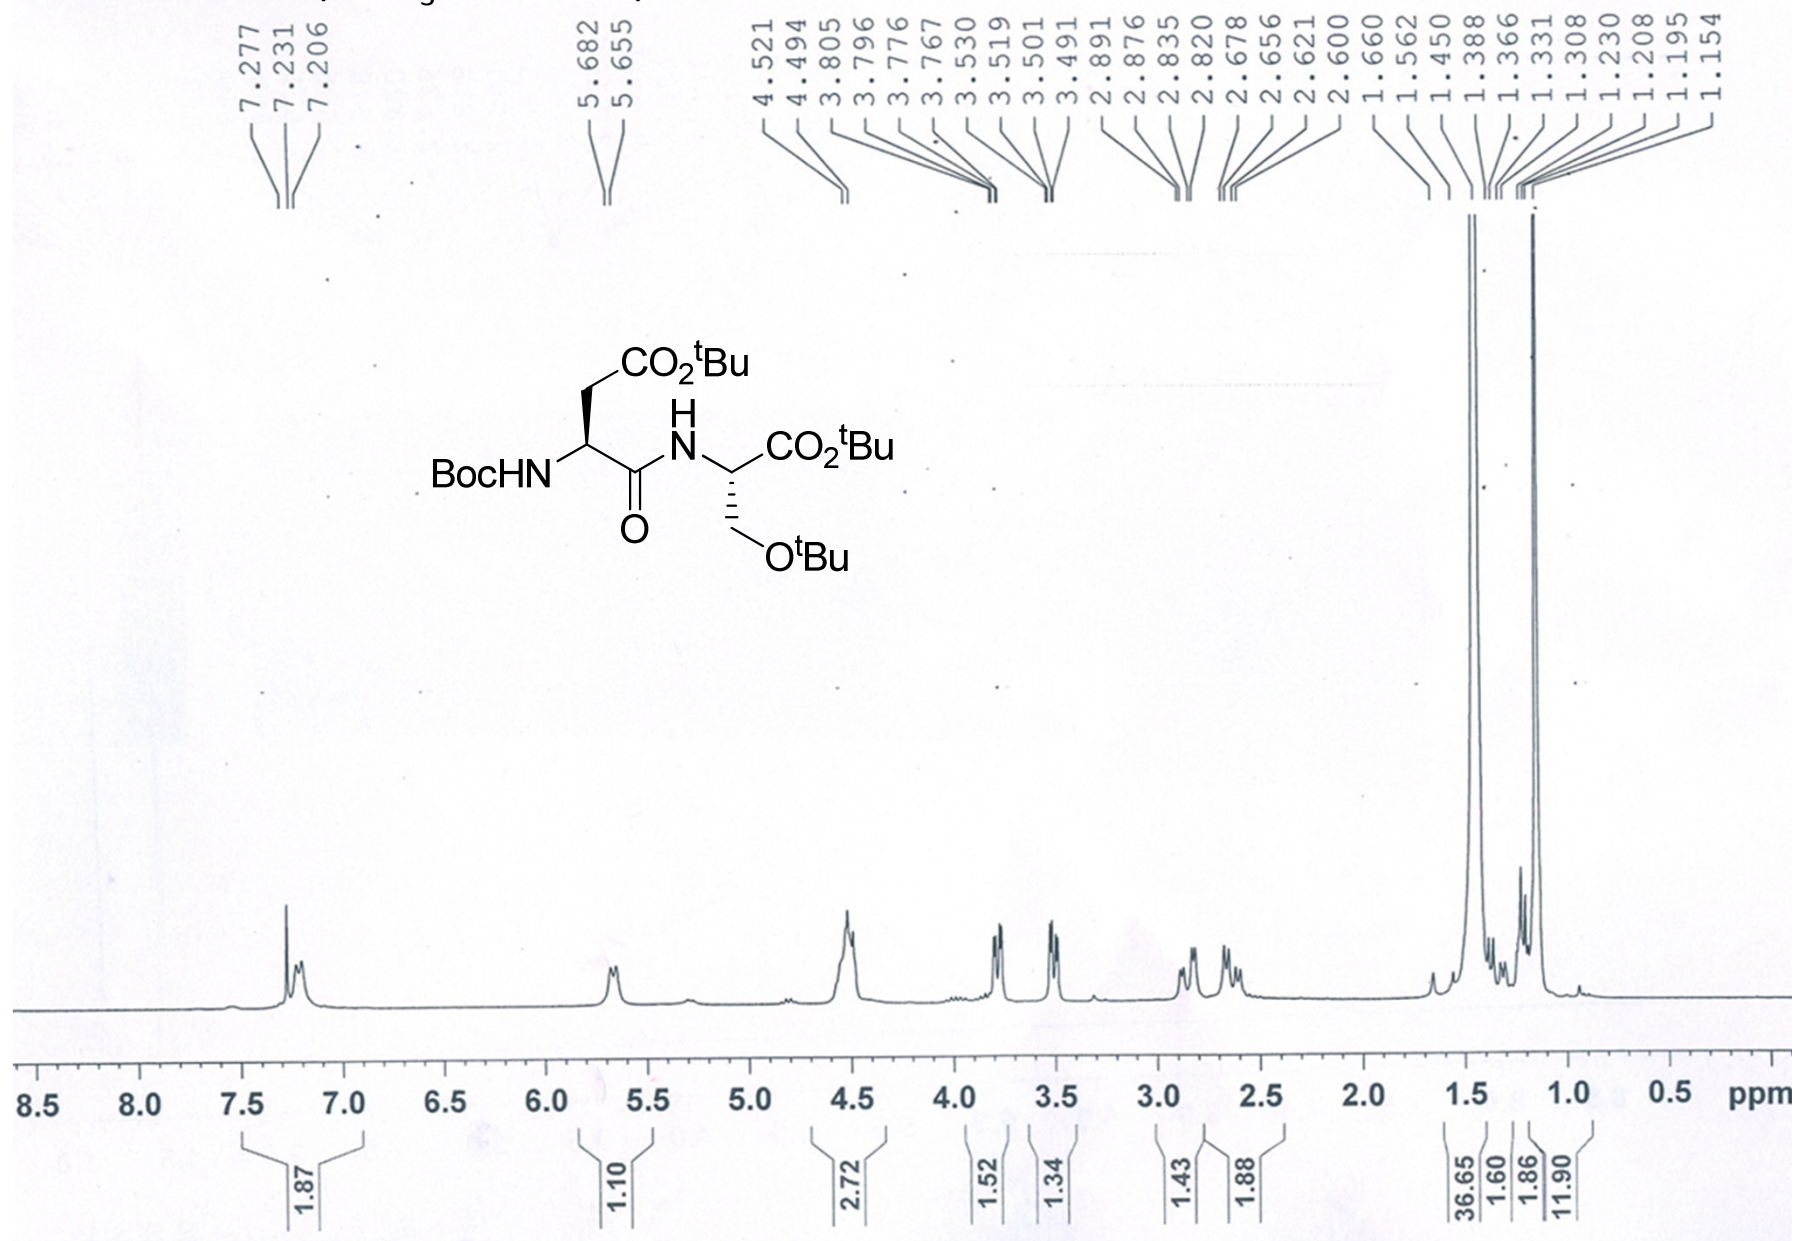

$^{13}\text{C}$  NMR of **7h** ( $\text{CDCl}_3$ , 75 MHz)

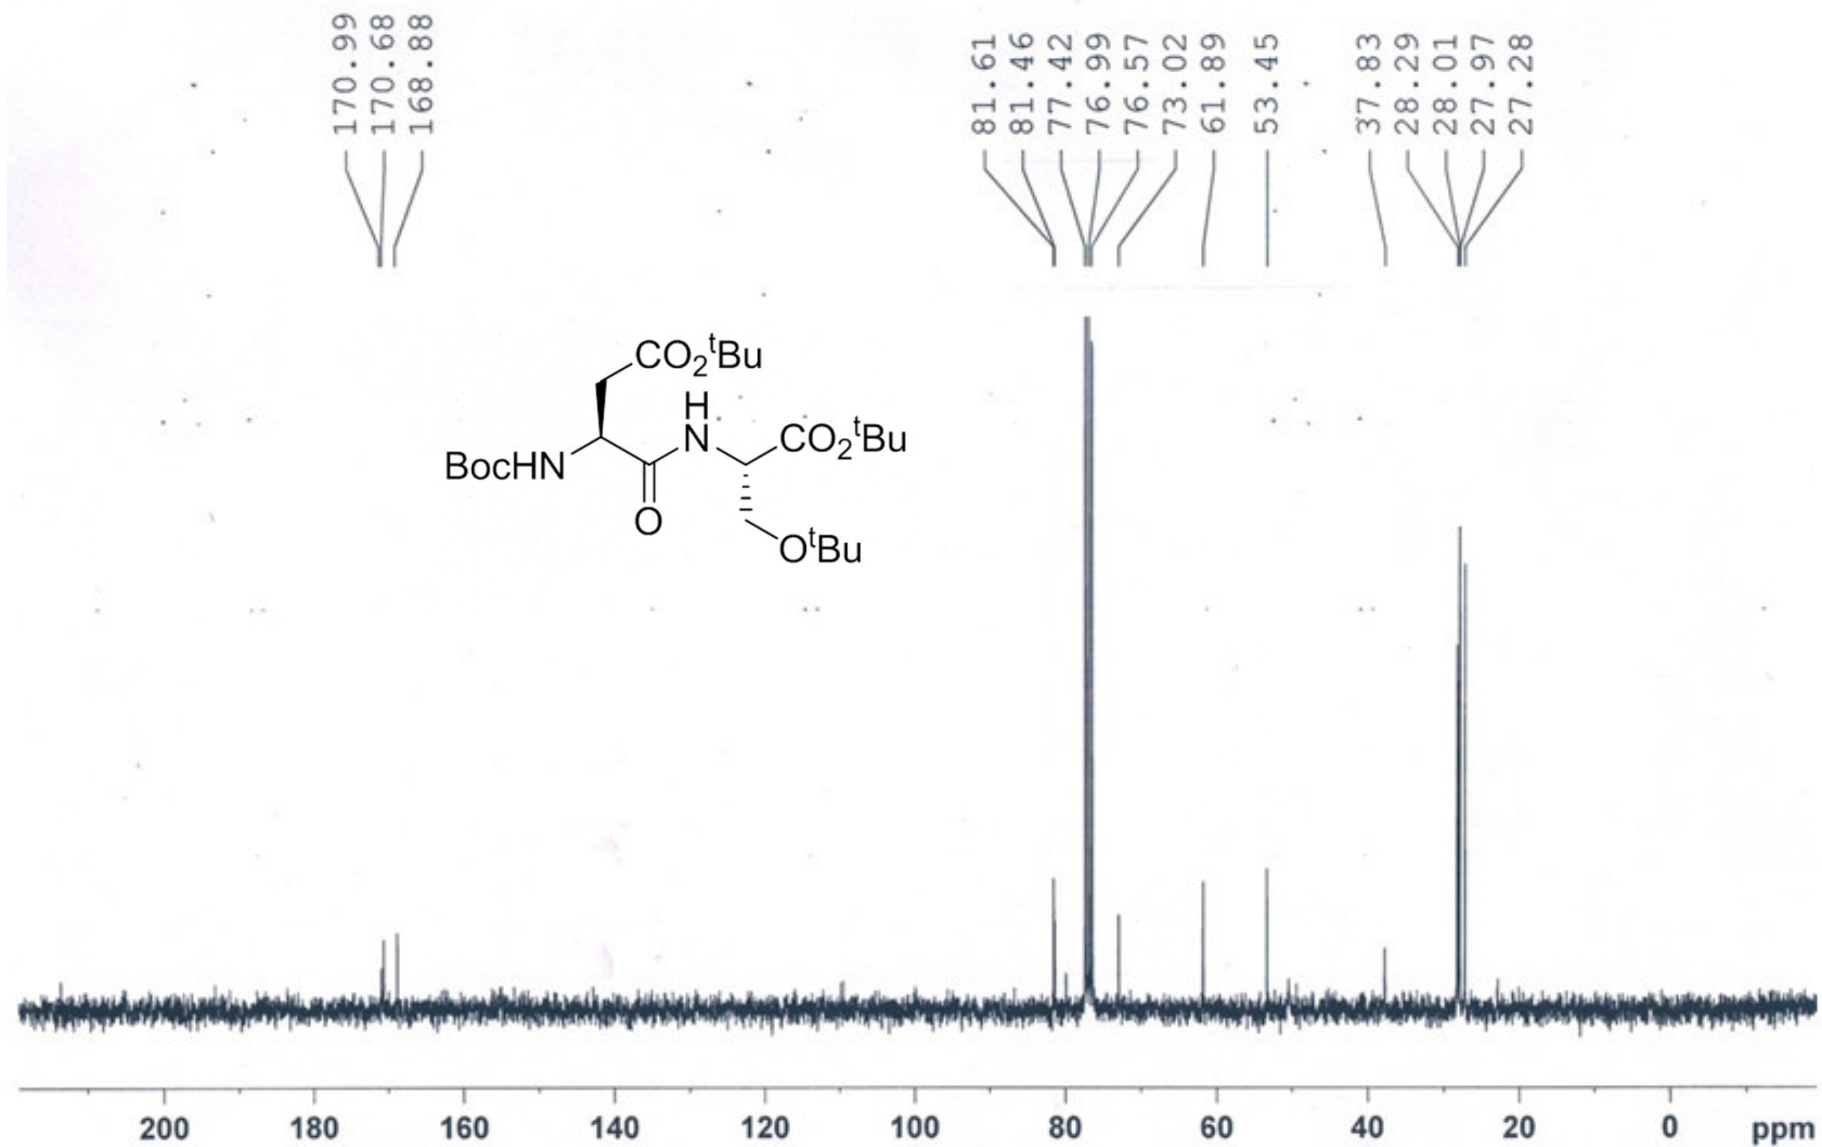

$^1\text{H}$  NMR of **8h** ( $\text{CDCl}_3$ , 300 MHz)

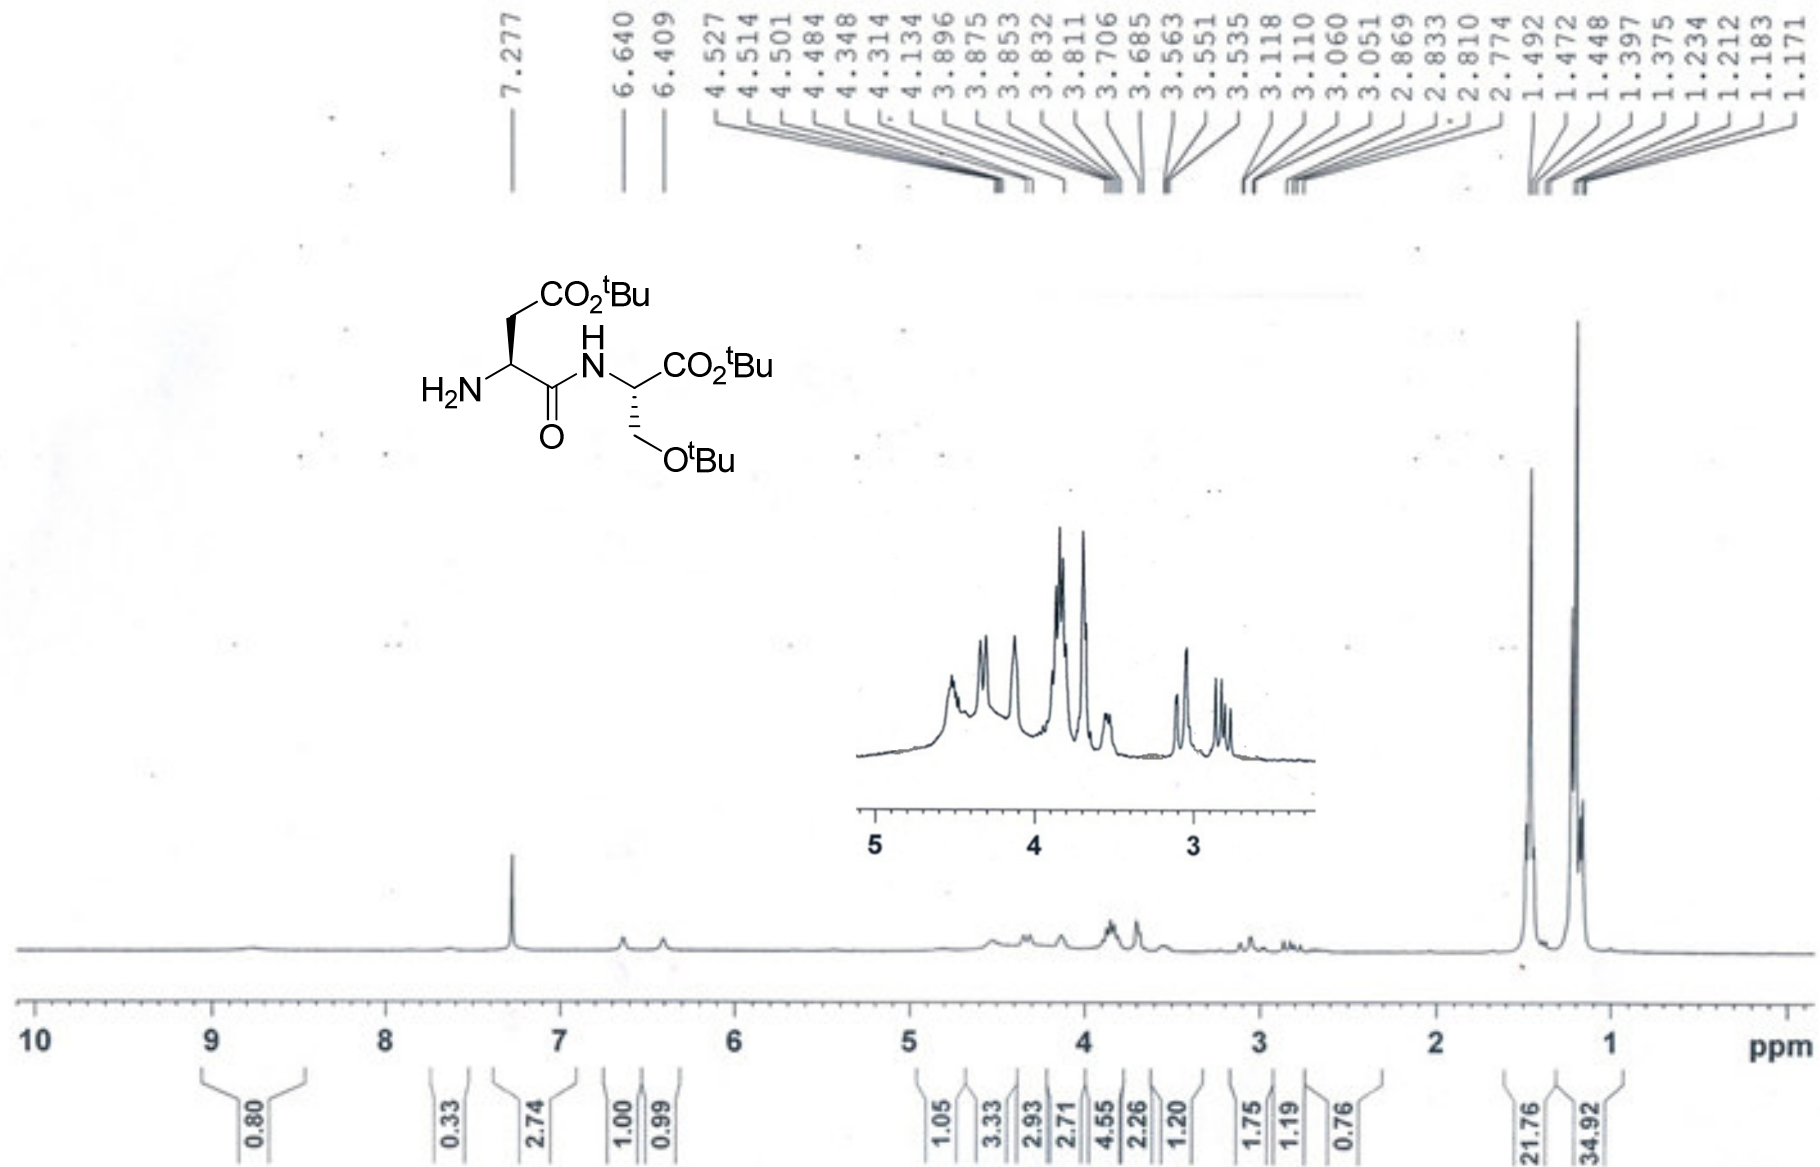

$^{13}\text{C}$  NMR of **8h** ( $\text{CDCl}_3$ , 75 MHz)

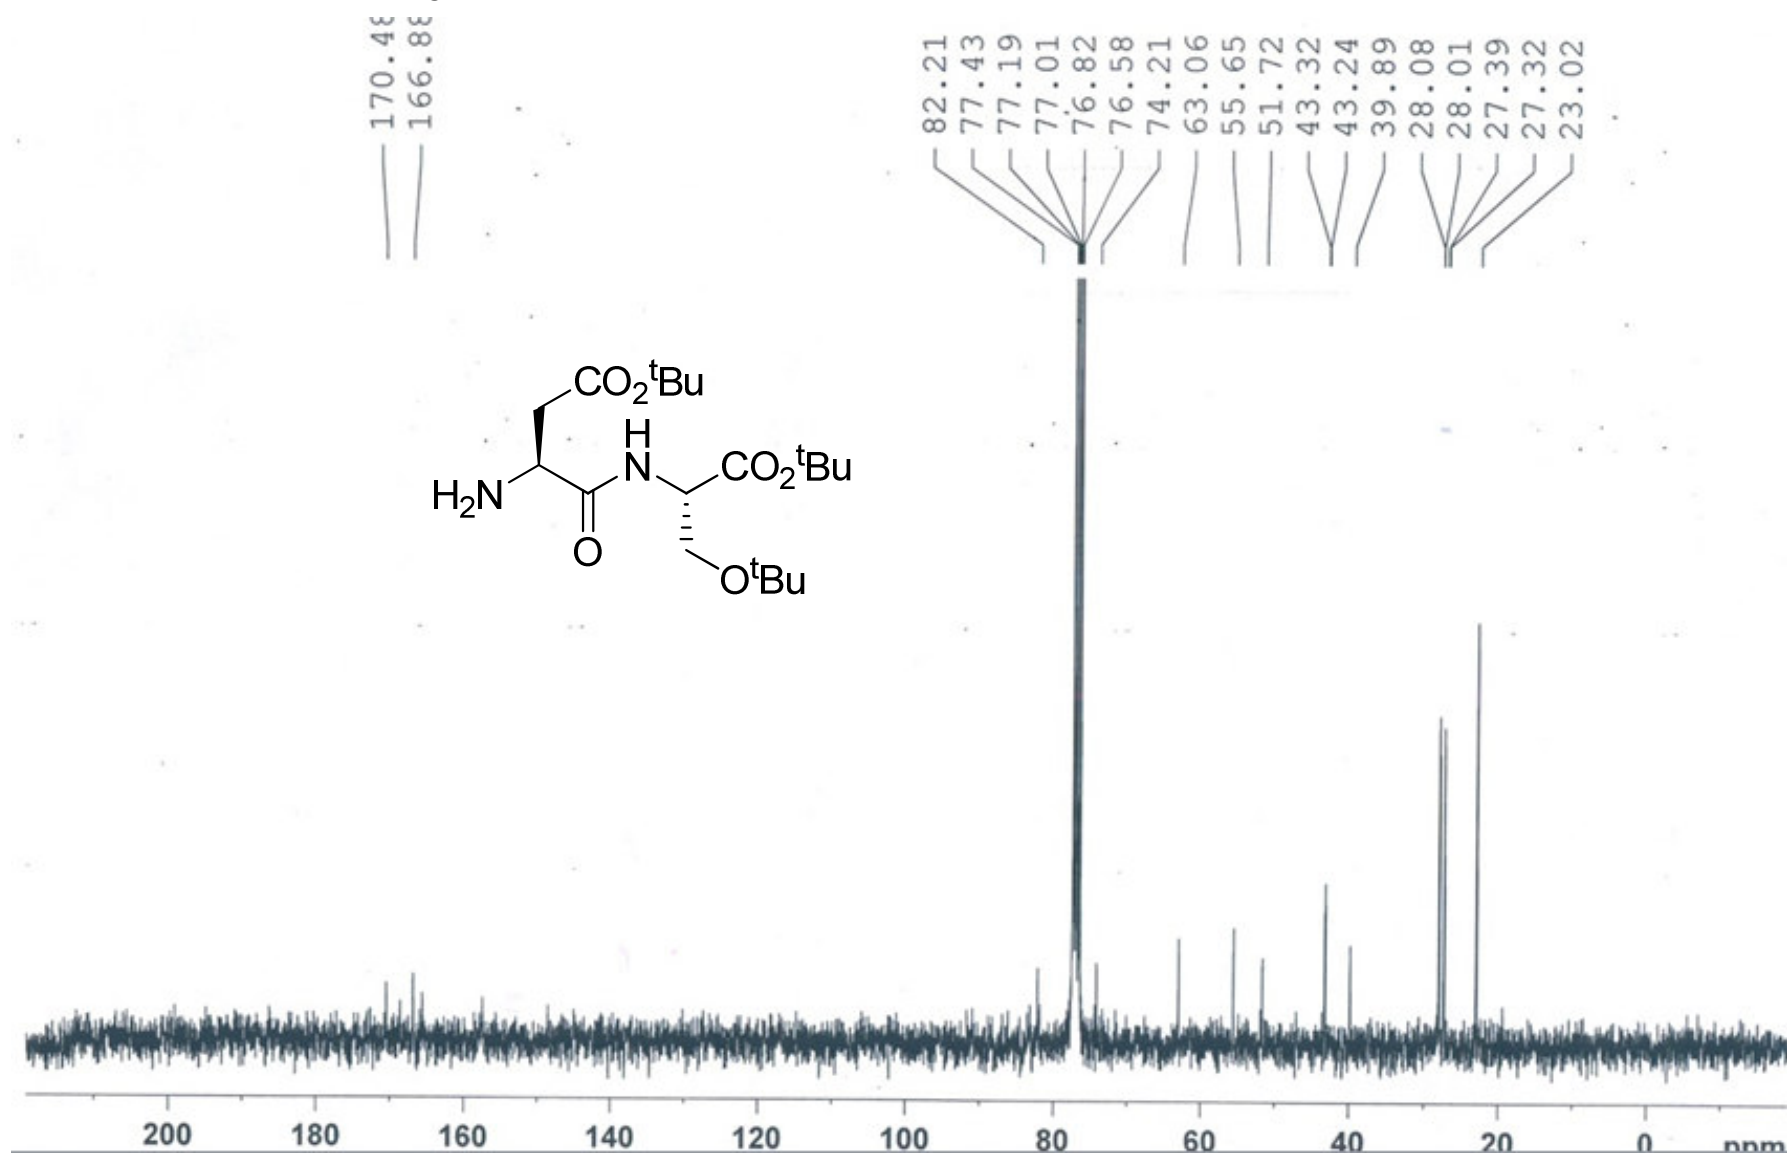

Supplement: c4ra13419b1.pdf [file c4ra13419b1.pdf]
